# Supplementary material for: Thermally activated delayed fluorescence emitters for efficient sensitization of europium(iii)
Source: Royal Society of Chemistry journal article supplement (doi:10.1039/d4cp01610f), 2024-01-01
Supplement: d4cp01610f1.pdf [file d4cp01610f1.pdf]

## Supplementary Information

### Thermally Activated Delayed Fluorescence Emitters for Efficient Sensitization of Europium (III)

Neena K Kalluvettukuzhy, Michal R Maciejczyk, Neil Robertson\*  
EaStCHEM School of Chemistry  
University of Edinburgh  
Kings Buildings, Edinburgh EH9 3FJ, U.K  
E-mail: [Neil.Robertson@ed.ac.uk](mailto:Neil.Robertson@ed.ac.uk)

### Table of Contents

| Section                   | Pages   |
|---------------------------|---------|
| Spectral characterization | S2-S8   |
| Optical properties        | S9-S25  |
| Sensitization mechanism   | S25-S26 |
| References                | S26     |

**Table S1:** Comparison of the  $^{19}\text{F}$  and  $^{31}\text{P}$  chemical shift values of ligands and complexes

| Ligands    |                                   |                                   | Complex                                  |                                   |                                   |
|------------|-----------------------------------|-----------------------------------|------------------------------------------|-----------------------------------|-----------------------------------|
|            | $^{19}\text{F}$<br>$\delta$ (ppm) | $^{31}\text{P}$<br>$\delta$ (ppm) |                                          | $^{19}\text{F}$<br>$\delta$ (ppm) | $^{31}\text{P}$<br>$\delta$ (ppm) |
| <b>tta</b> | -75.7                             | -                                 | <b>Eutta<sub>3</sub>·2H<sub>2</sub>O</b> | -82.3                             | -                                 |
| <b>1L</b>  | -                                 | 28.38 –<br>28.26 (m)              | <b>1</b>                                 | -79.7                             | -76.5                             |
| <b>2L</b>  | -                                 | 28.37 –<br>28.52 (m)              | <b>2</b>                                 | -79.5                             | -76.3                             |
| <b>3L</b>  | -                                 | 28.58 –<br>28.43 (m)              | <b>3</b>                                 | -79.5                             | -75.9                             |

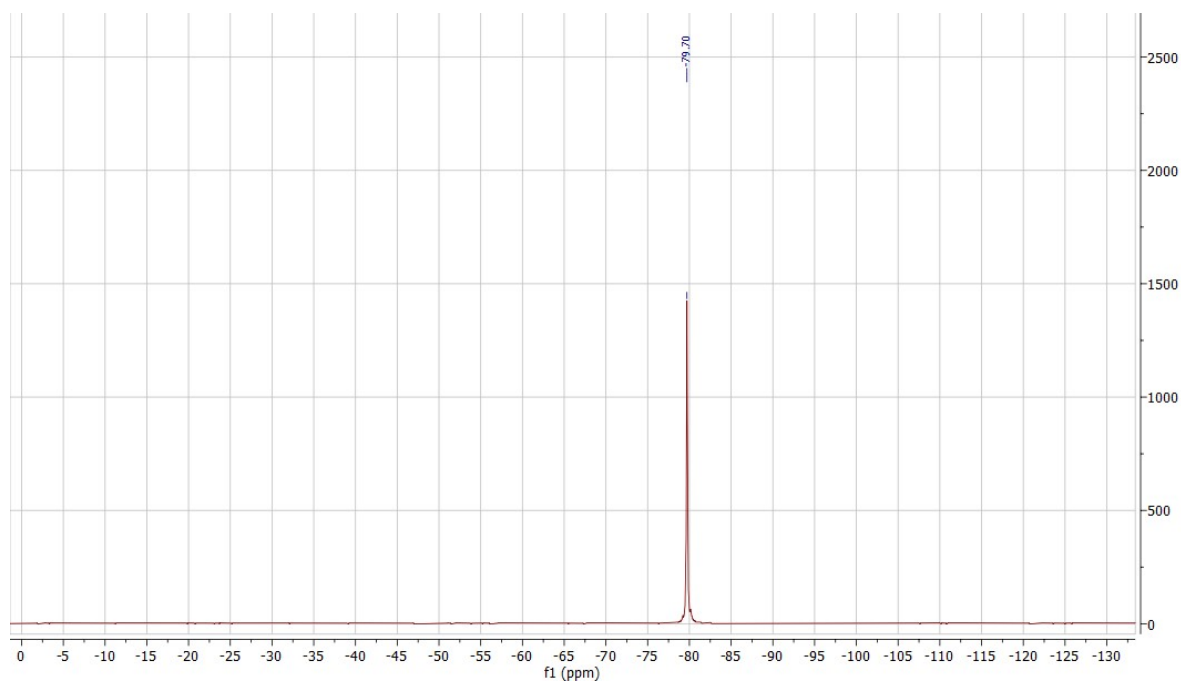

**Figure S1.**  $^{19}\text{F}$  NMR spectra of Eu(III) coordination polymer **1** in  $\text{C}_6\text{D}_6$  at 25 °C

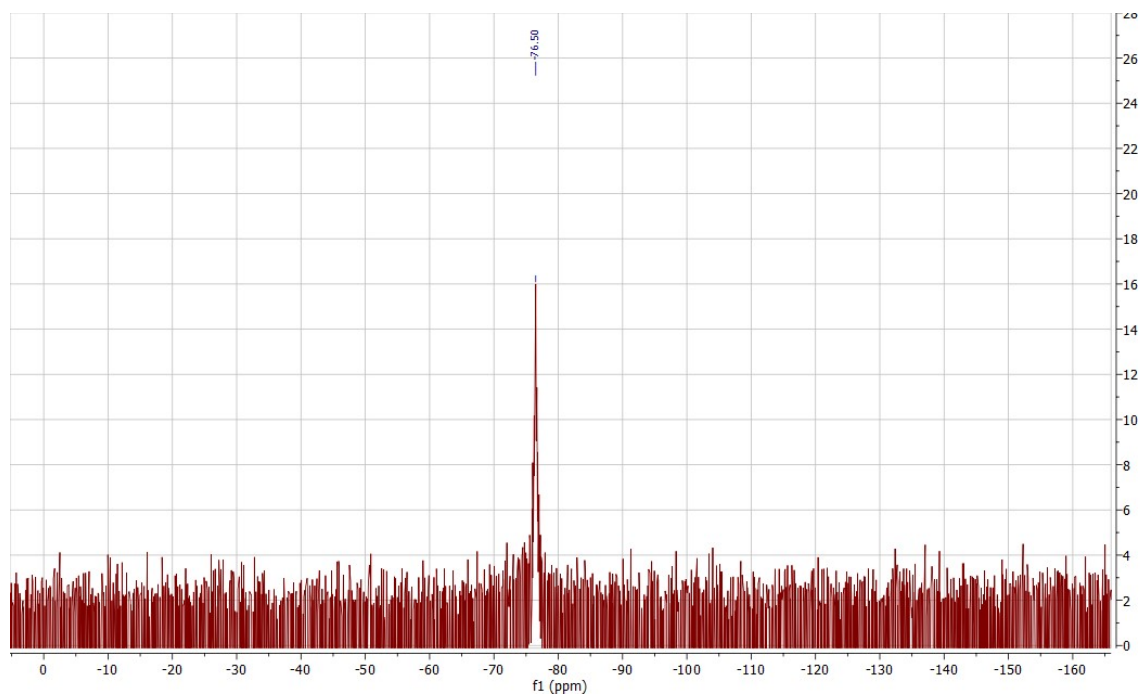

**Figure S2.**  $^{31}\text{P}$  NMR spectra of Eu (III) coordination polymer **1** in  $\text{C}_6\text{D}_6$  at 25 °C

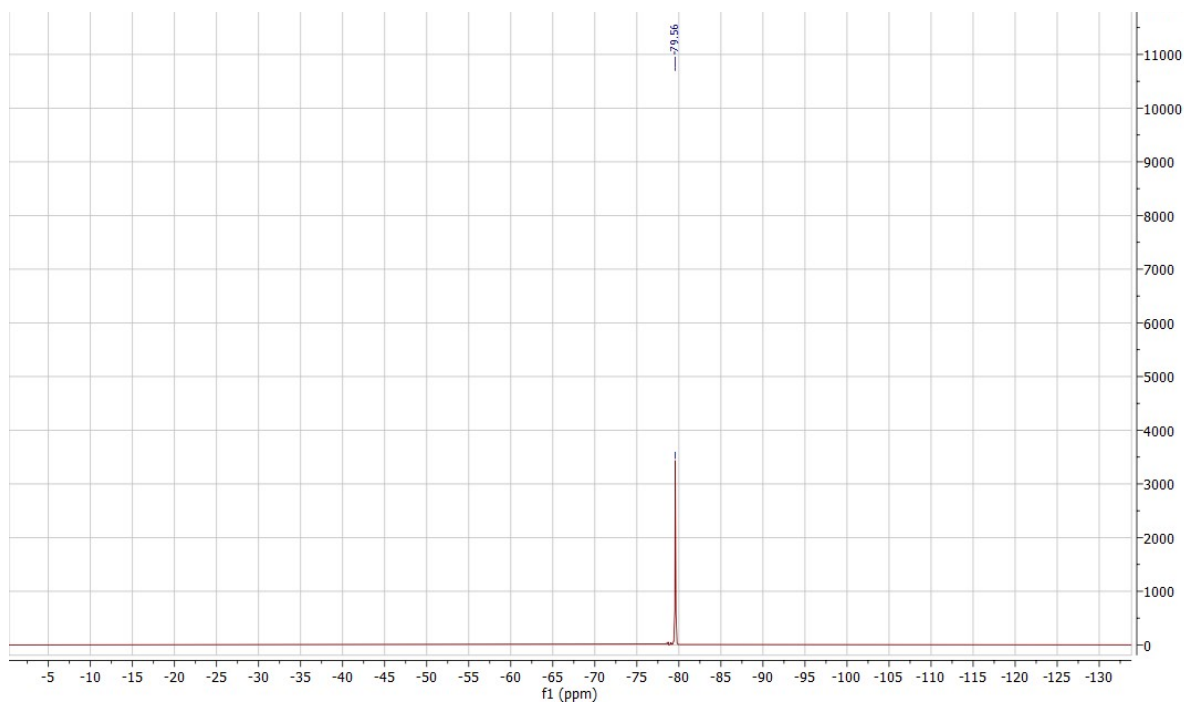

**Figure S3.**  $^{19}\text{F}$  NMR spectra of Eu(III) coordination polymer **2** in  $\text{C}_6\text{D}_6$  at 25 °C

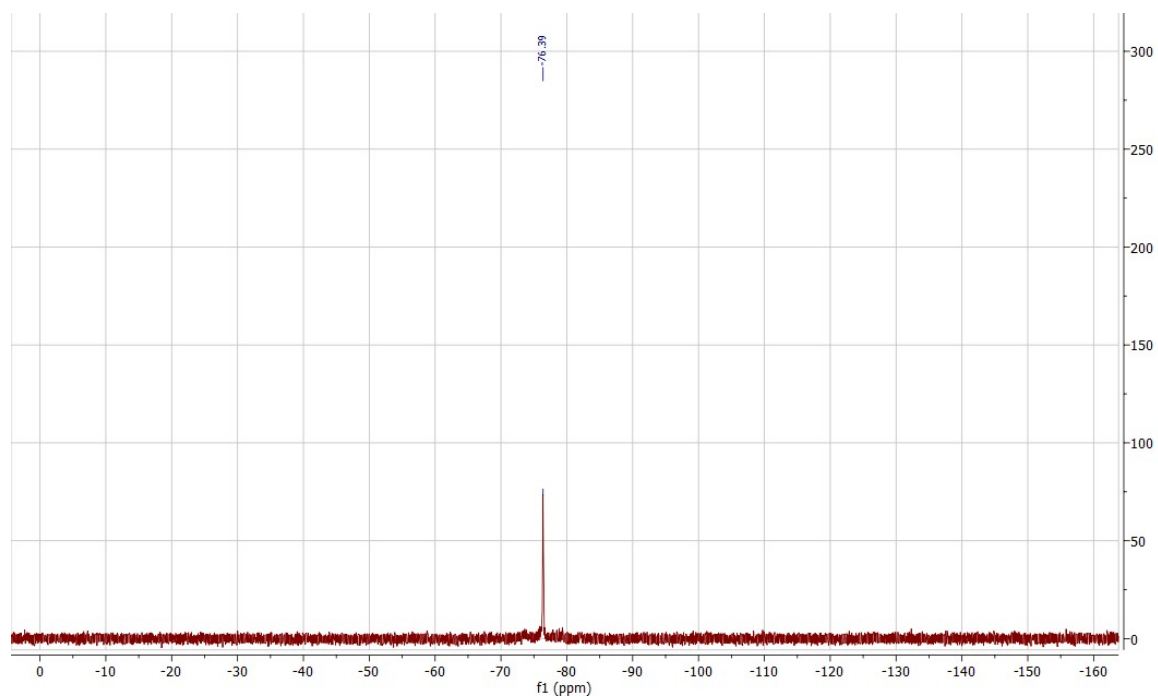

Figure S4.  $^{31}\text{P}$  NMR spectra of Eu(III) coordination polymer **2** in  $\text{C}_6\text{D}_6$  at 25 °C

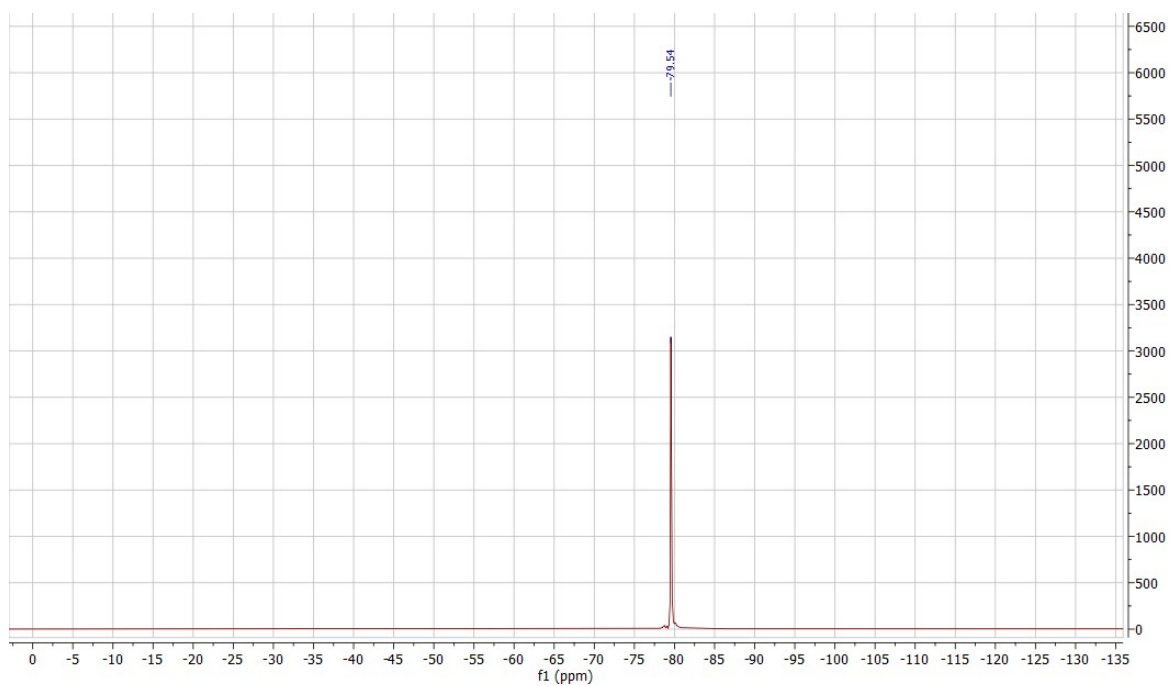

Figure S5.  $^{19}\text{F}$  NMR spectra of Eu(III) coordination polymer **3** in  $\text{C}_6\text{D}_6$  at 25 °C

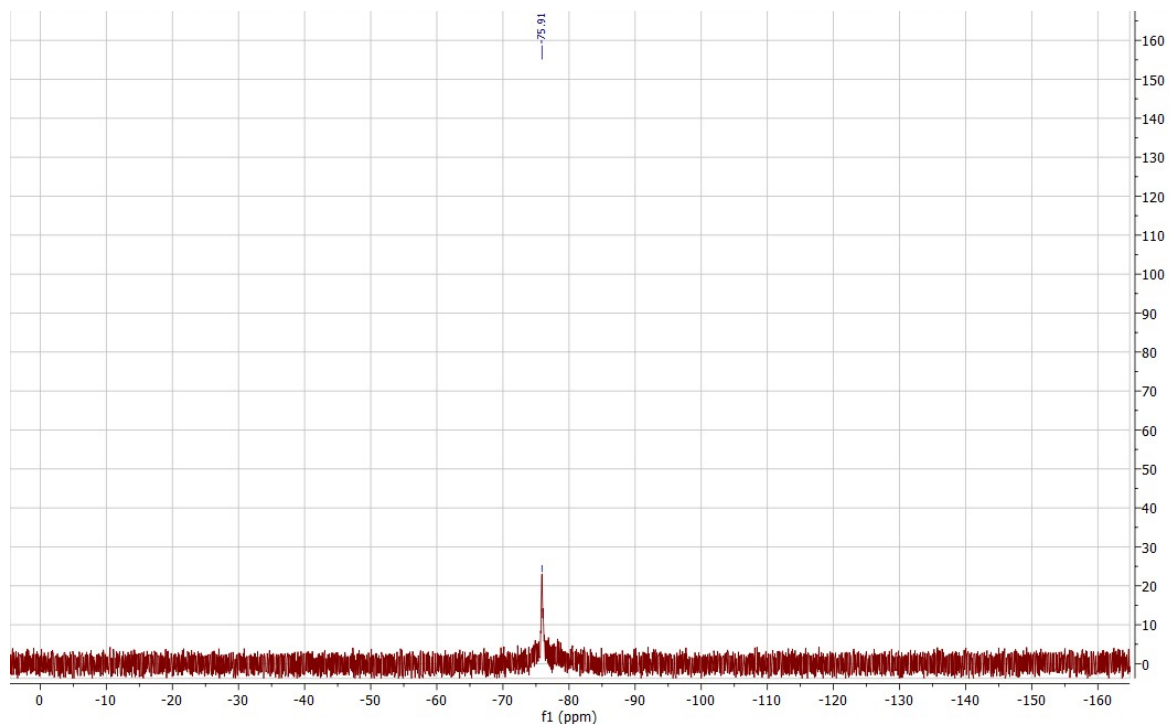

Figure S6.  $^{31}\text{P}$  NMR spectra of Eu(III) coordination polymer **3** in  $\text{C}_6\text{D}_6$  at  $25^\circ\text{C}$

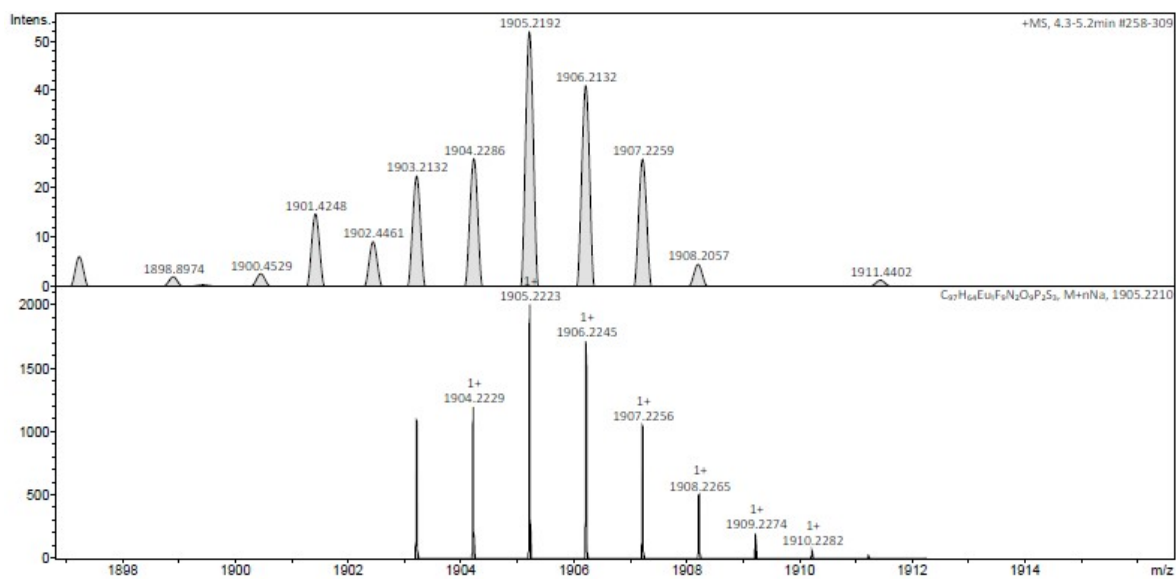

Figure S7. ESI-MS of Eu(III) coordination polymer **1**

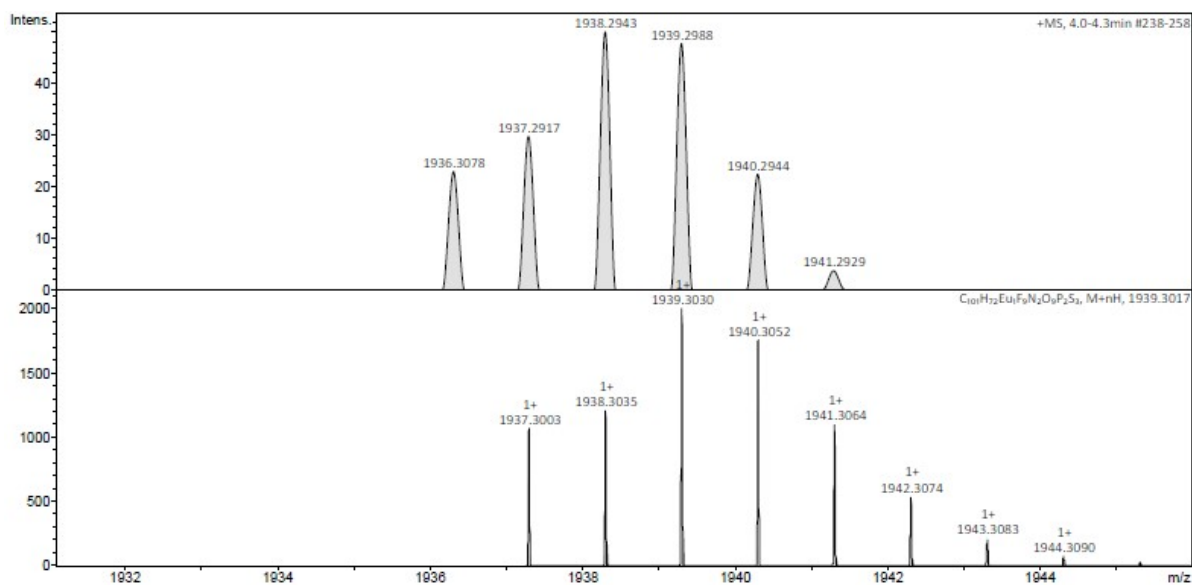

Figure S8. ESI-MS of Eu(III) coordination polymer 2

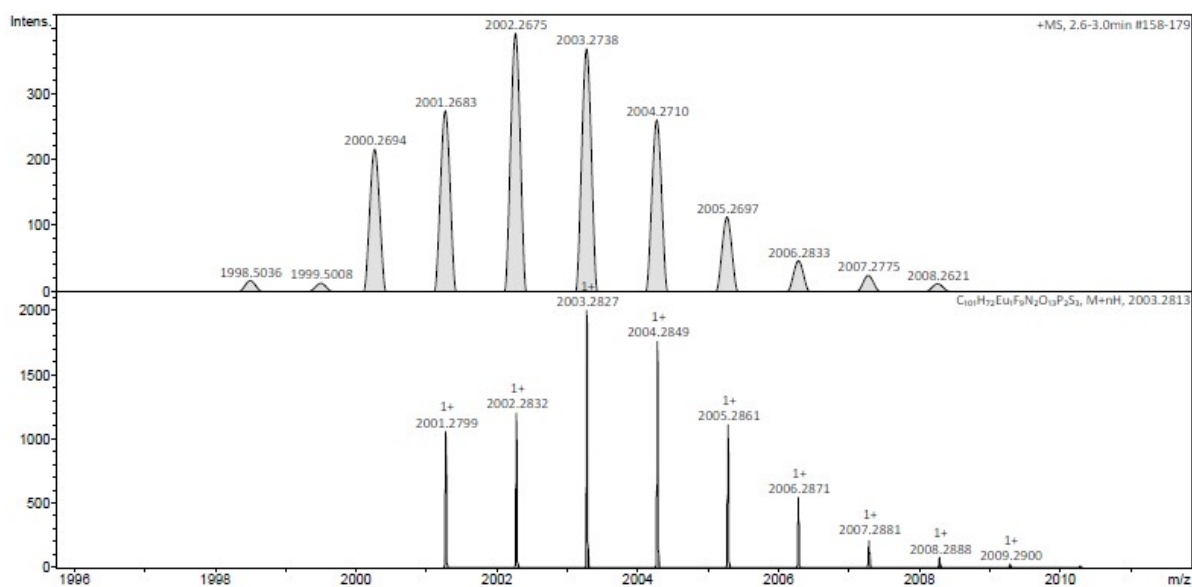

Figure S9. ESI-MS of Eu(III) coordination polymer 3

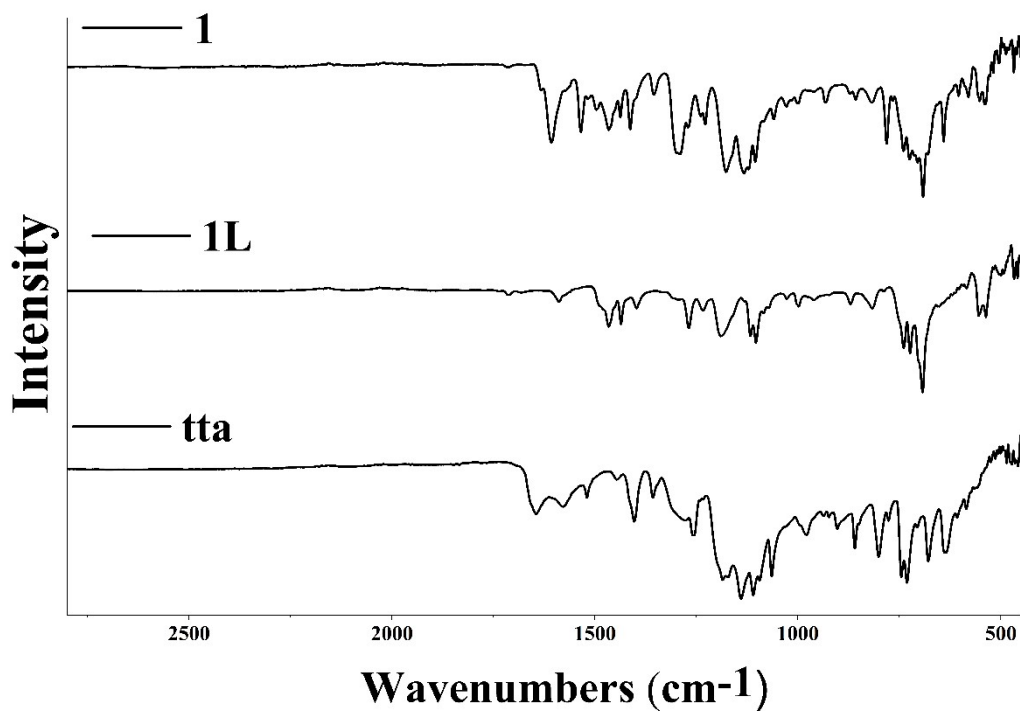

**Figure S10.** IR spectra of Eu (III) coordination polymer **1** and corresponding ligands

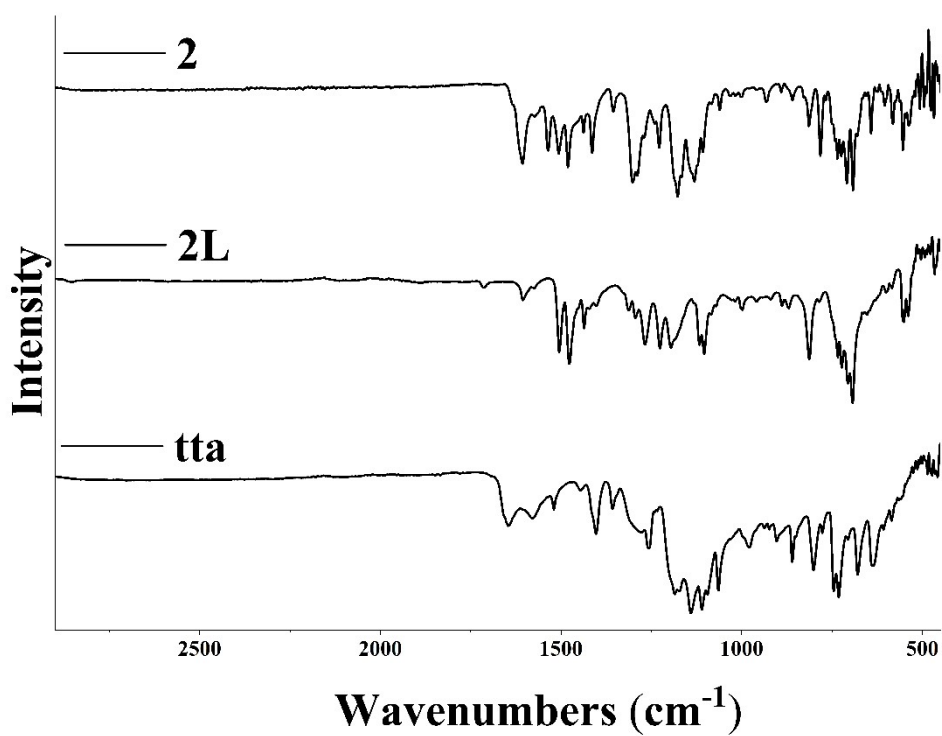

**Figure S11.** IR spectra of Eu (III) coordination polymer **2** and corresponding ligands

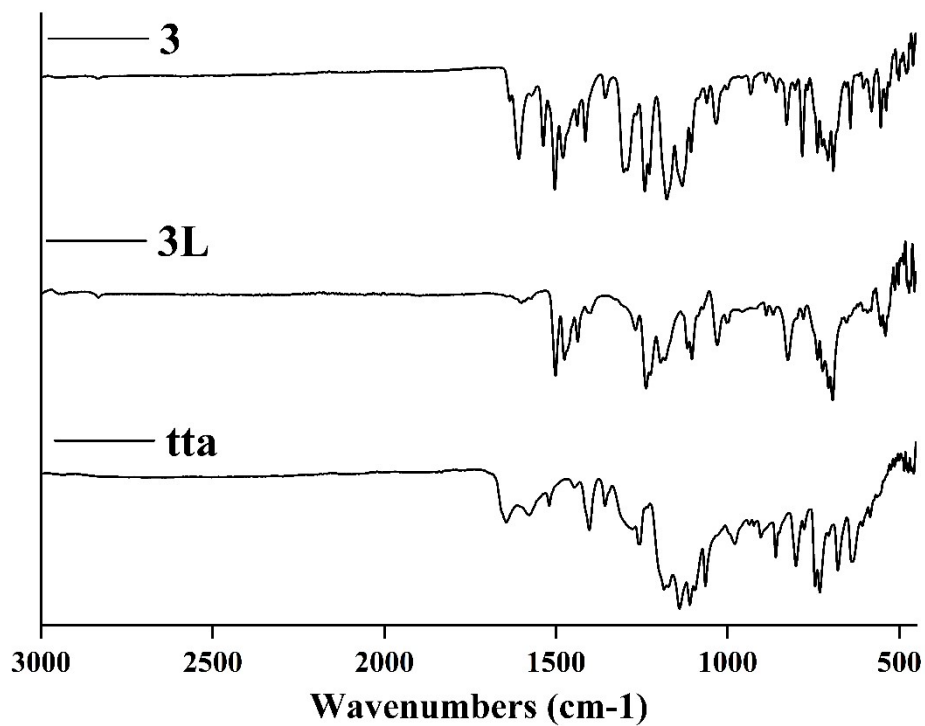

Figure S12. IR spectra of Eu (III) coordination polymer **3** and corresponding ligands

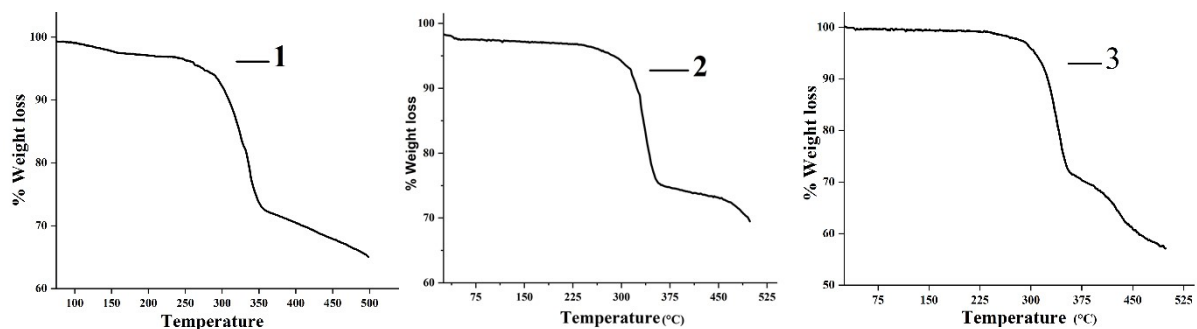

Figure S13. Thermo-Gravimetric Analysis (TGA) of Eu (III) coordination polymer **1**, **2** and **3**



## Optical Properties

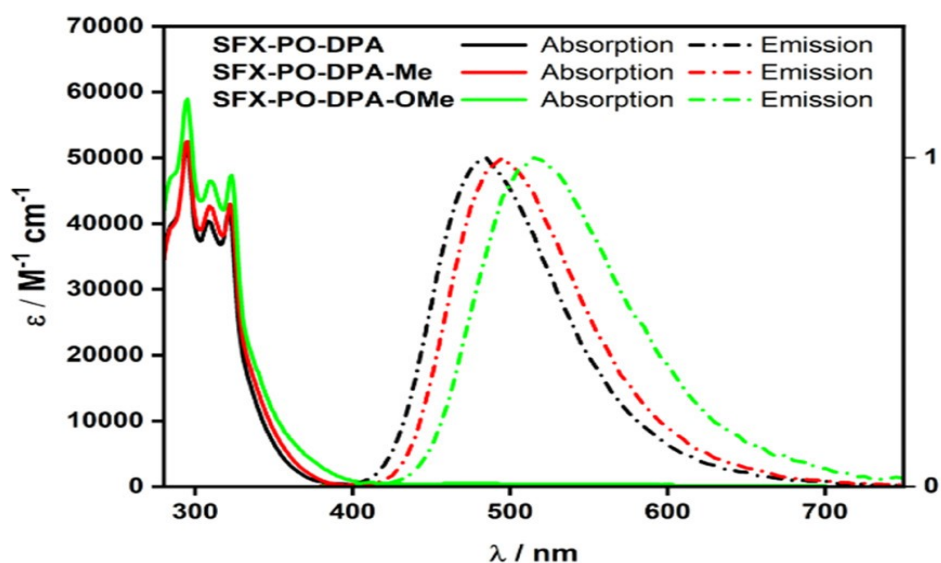

**Figure S14.** UV-Vis absorption and luminescence spectra of TADF ligands (SFX-PO-DPA is **1L**, SFX-PO-DPA-Me is **2L** and SFX-PO-DPA-OMe is **3L**) in toluene solution (Adapted from ref 1, Copyright, 2021, American Chemical Society).<sup>1</sup>

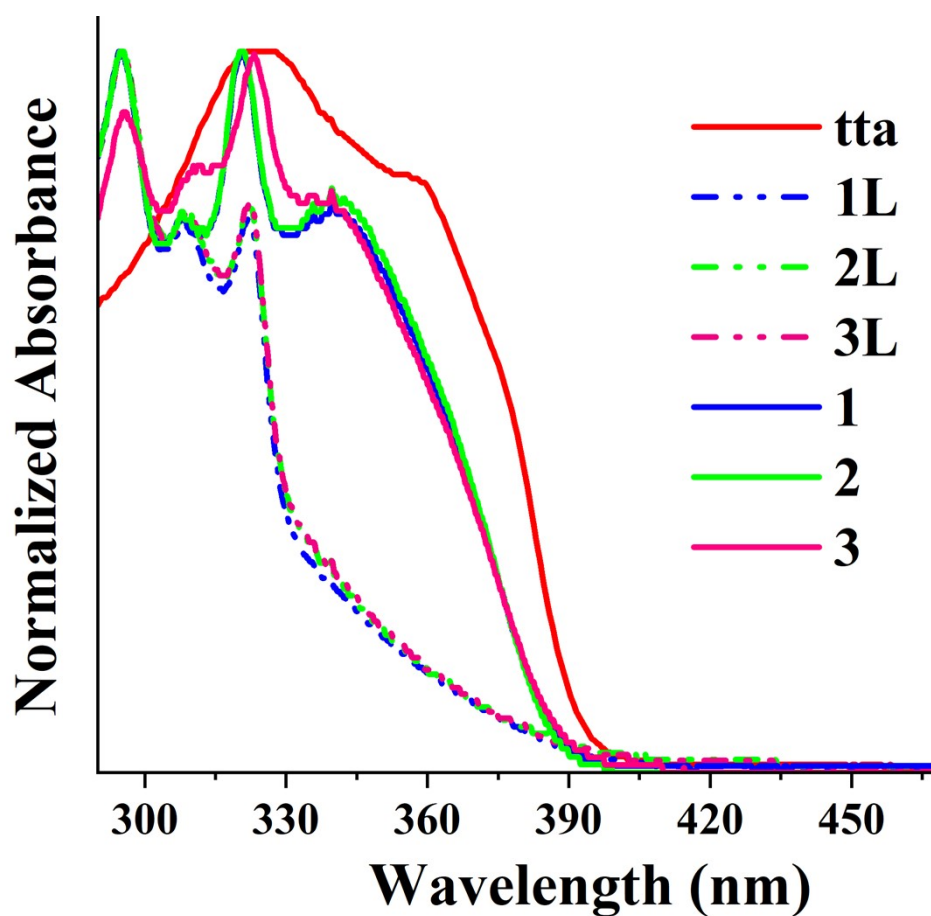

**Figure S15.** Comparison of UV-Vis absorption spectra of tta, TADF ligands (**1L**, **2L**, and **3L**) and corresponding Eu(III) coordination polymers (**1**, **2** and **3**) in toluene solution

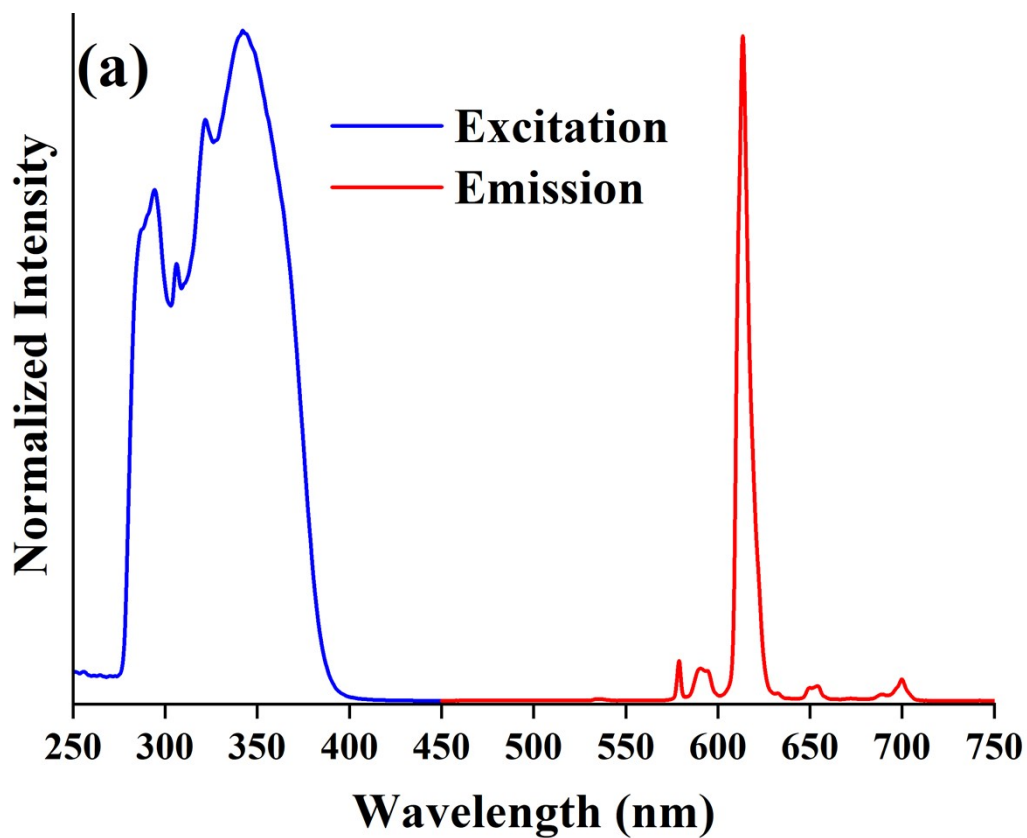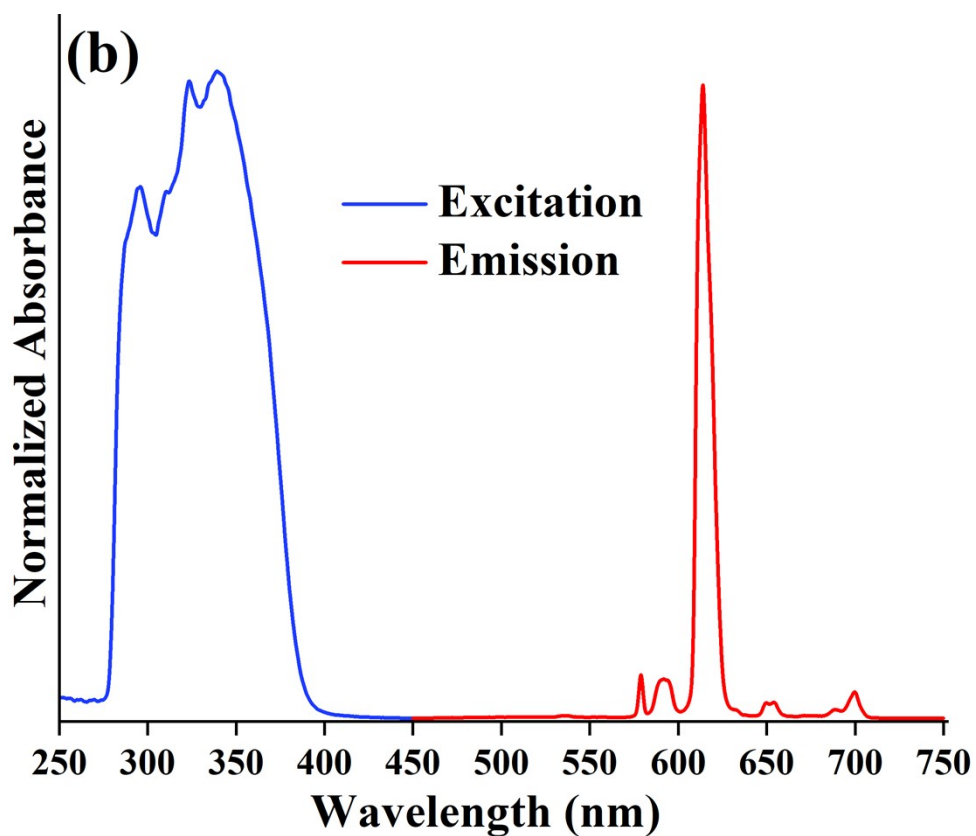

**Figure S16.** Excitation and luminescence spectra of (a) **1** (b) **2** in toluene solution ( $\lambda_{\text{ex}} = 340$  nm and  $\lambda_{\text{em}} = 611$  nm)

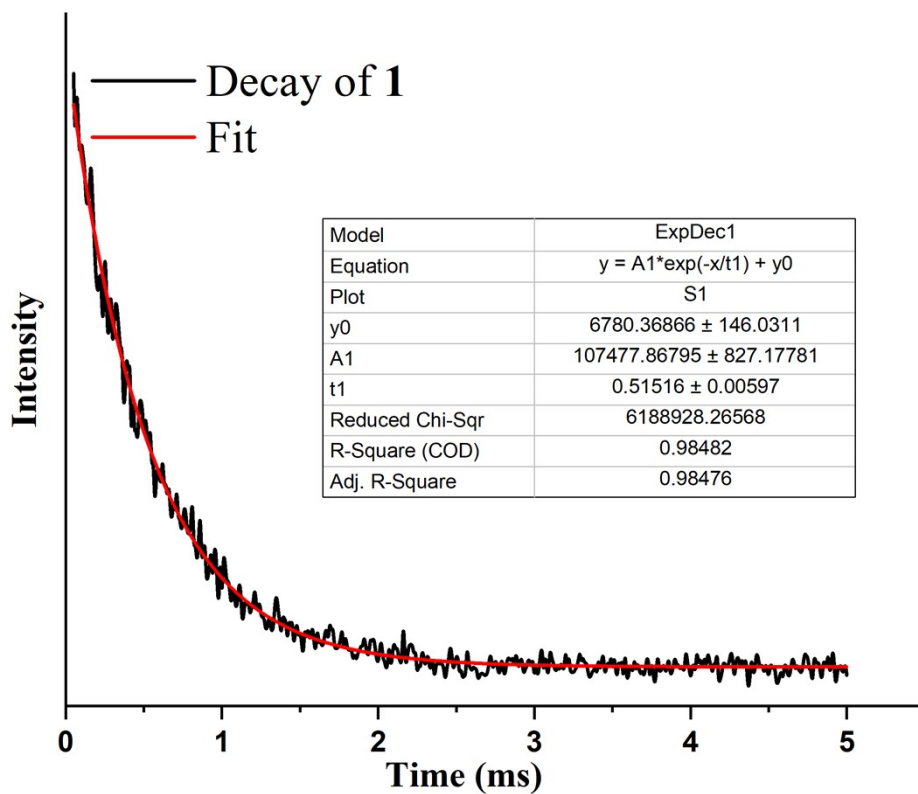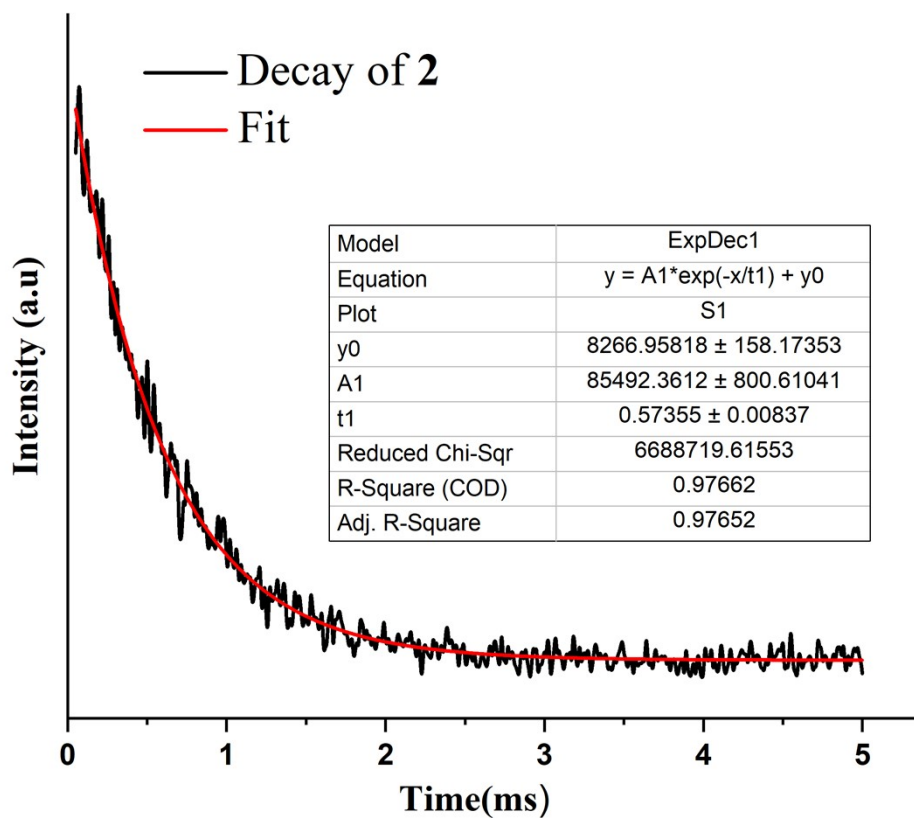

Figure S17. Luminescence decay profiles of complexes 1 and 2 in toluene solution ( $\lambda_{ex}=340$  and  $\lambda_{em}=611$  nm)

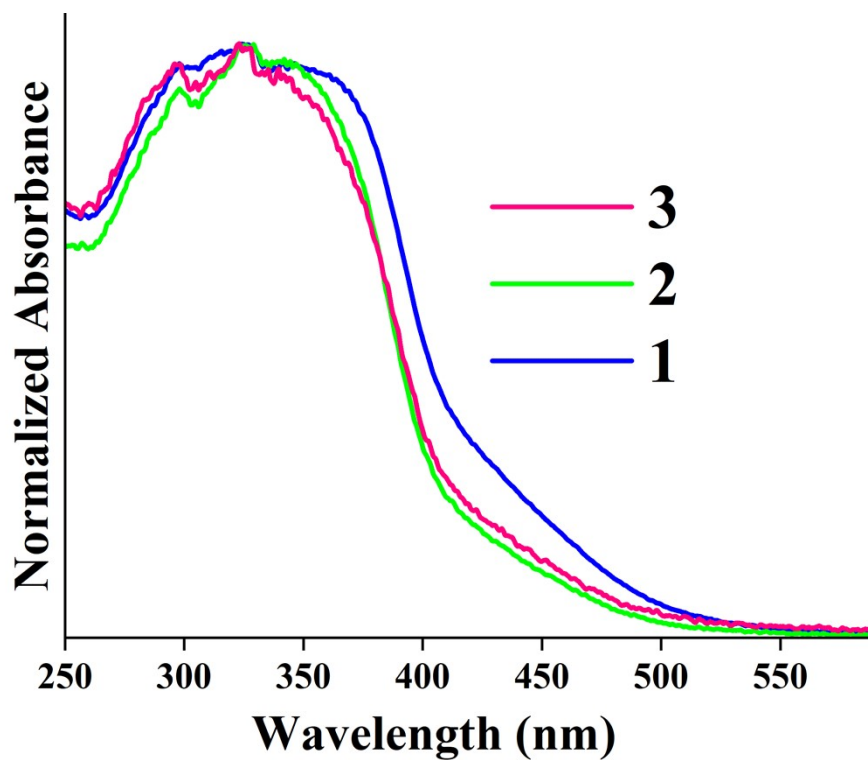

Figure S18. UV-Vis absorption spectra of powder samples of 1-3

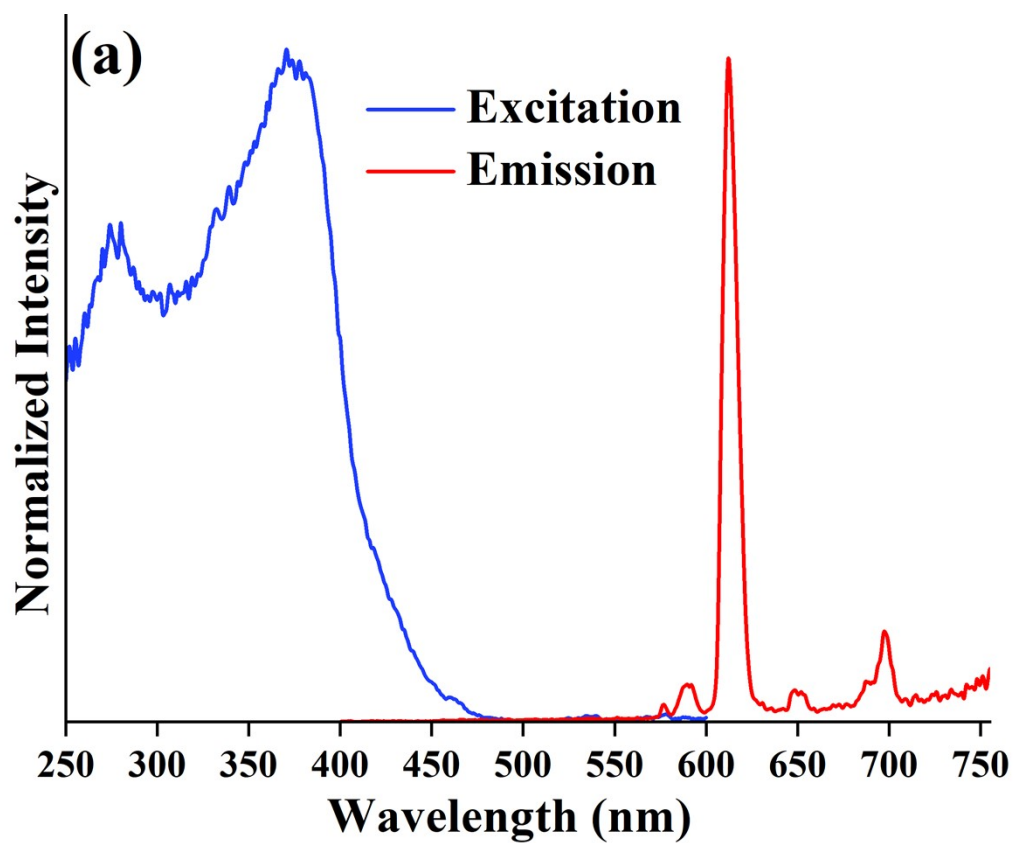

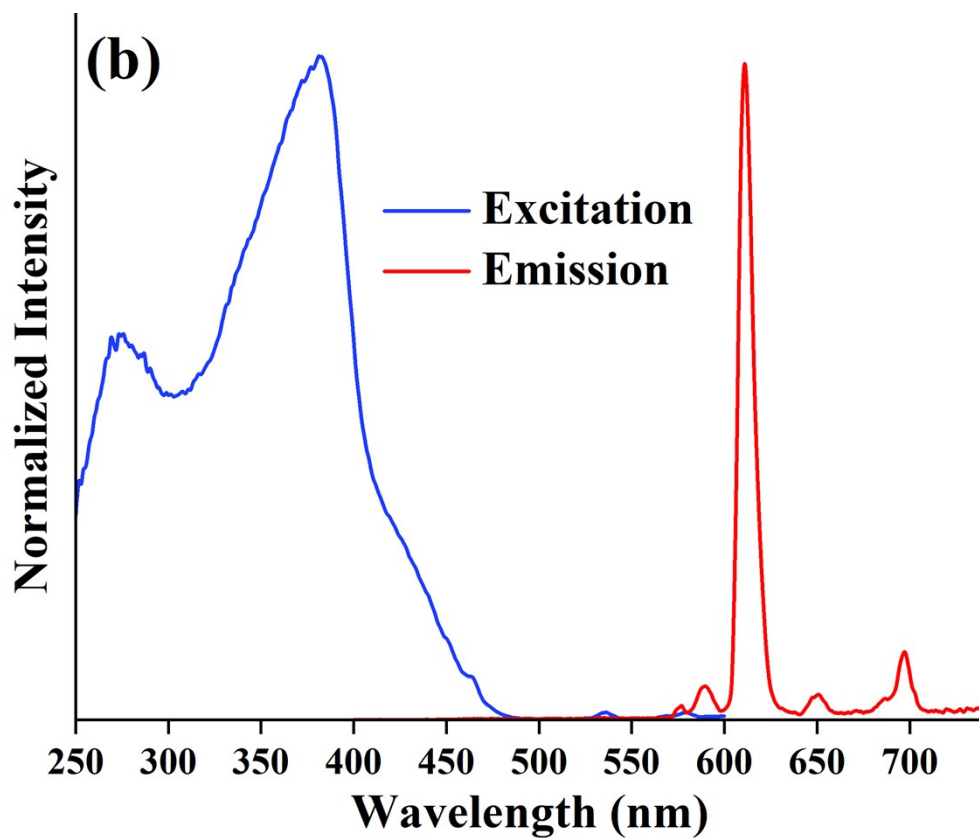

Figure S19. Excitation and luminescence spectra of (a) 1 (b) 2 powder samples ( $\lambda_{\text{ex}} = 340$  nm and  $\lambda_{\text{em}} = 611$  nm)

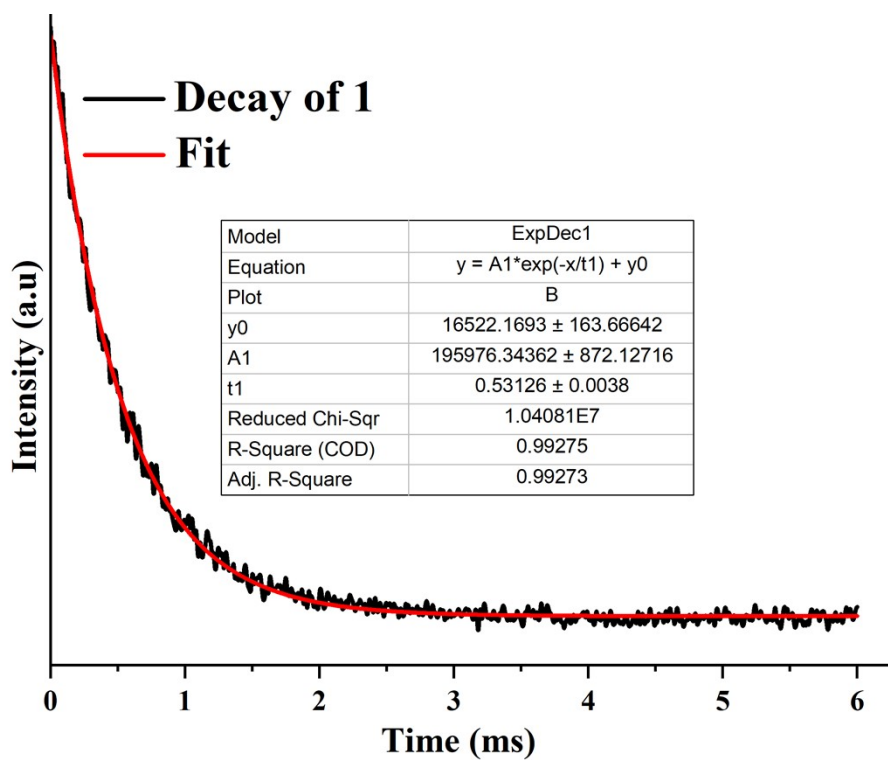

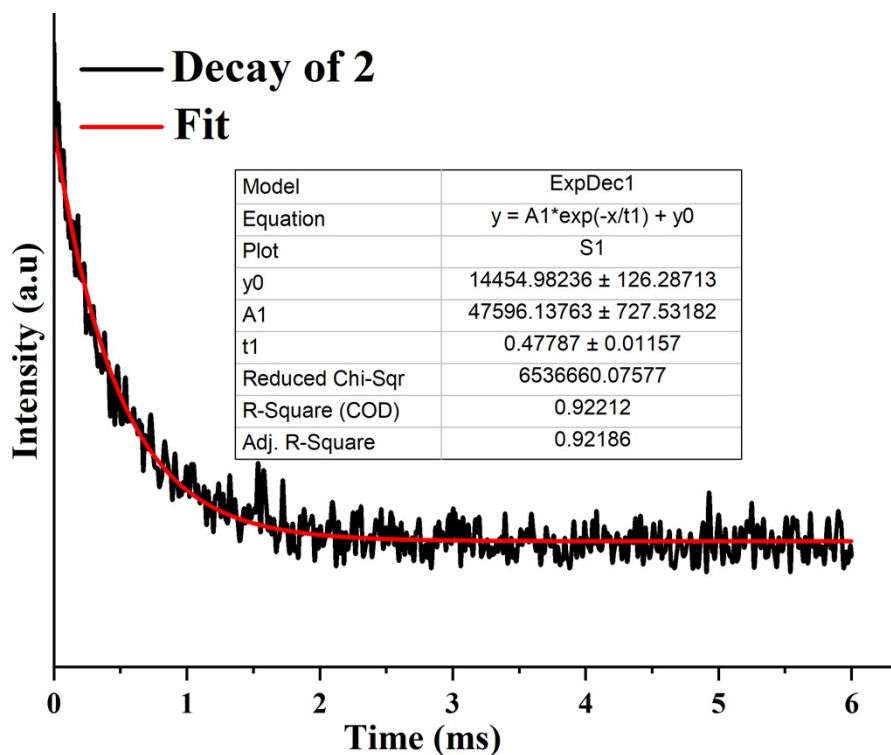

Figure S20. Luminescence decay profiles of powder samples of complexes **1** and **2** ( $\lambda_{ex}$ =340 and  $\lambda_{em}$ =611 nm)

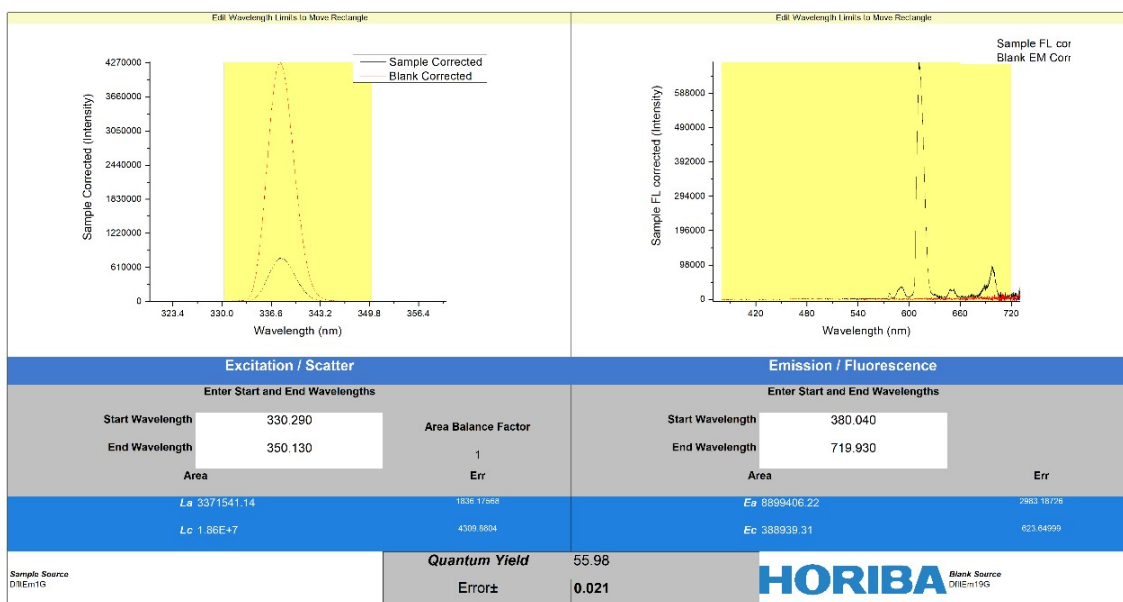

Figure S21. Absolute luminescence quantum yield measurements of solid samples of **1** ( $\lambda_{ex}$ =340)

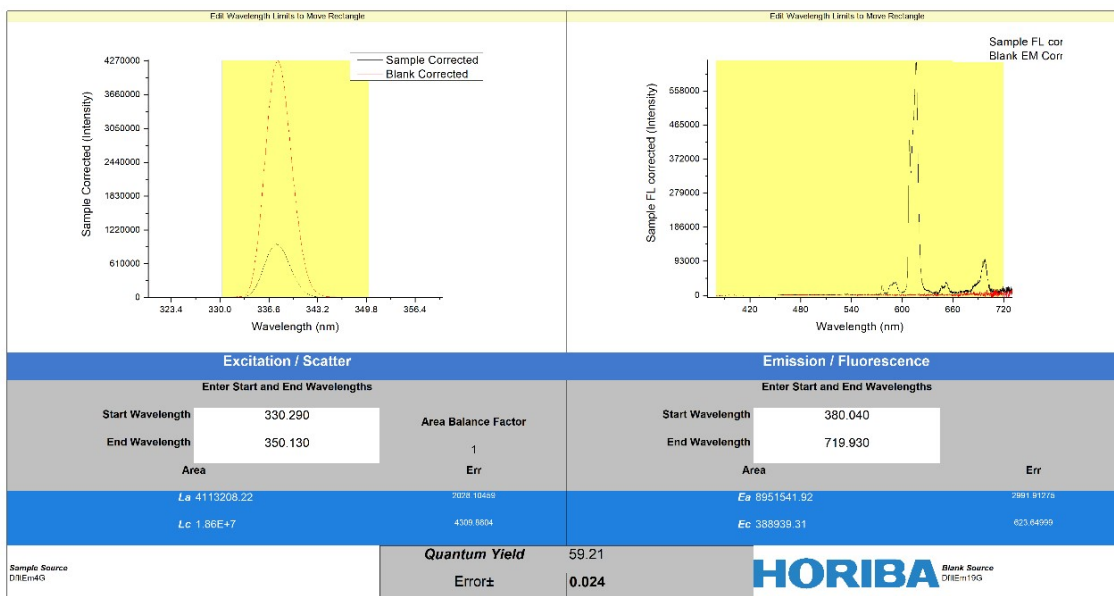

Figure S22. Absolute luminescence quantum yield measurements of solid samples of **2** ( $\lambda_{ex}=340$ )

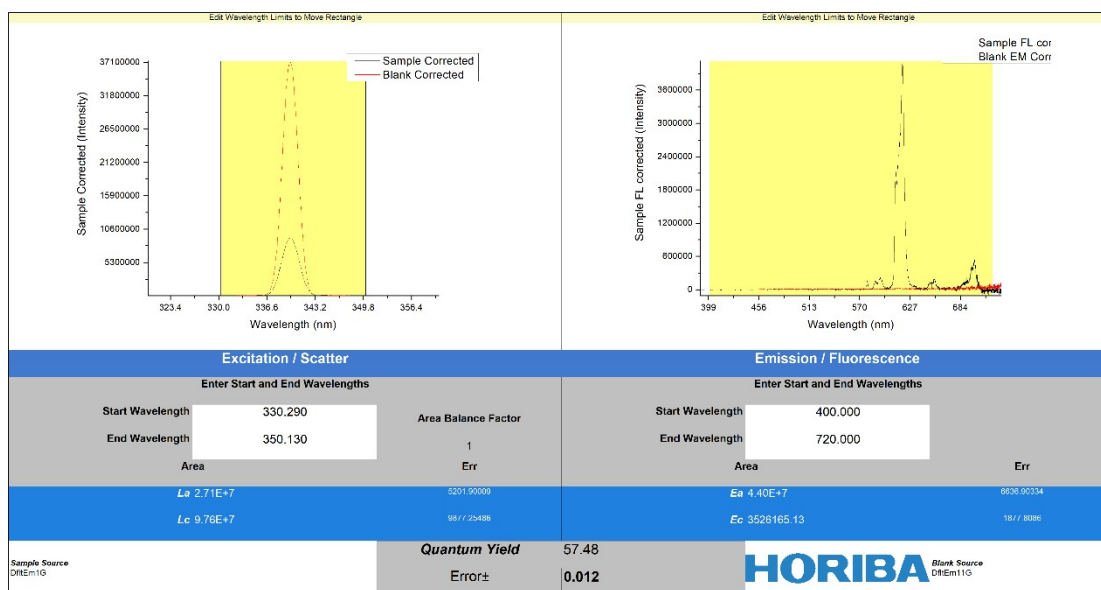

Figure S23. Absolute luminescence quantum yield measurements of solid samples of **3** ( $\lambda_{ex}=340$ )



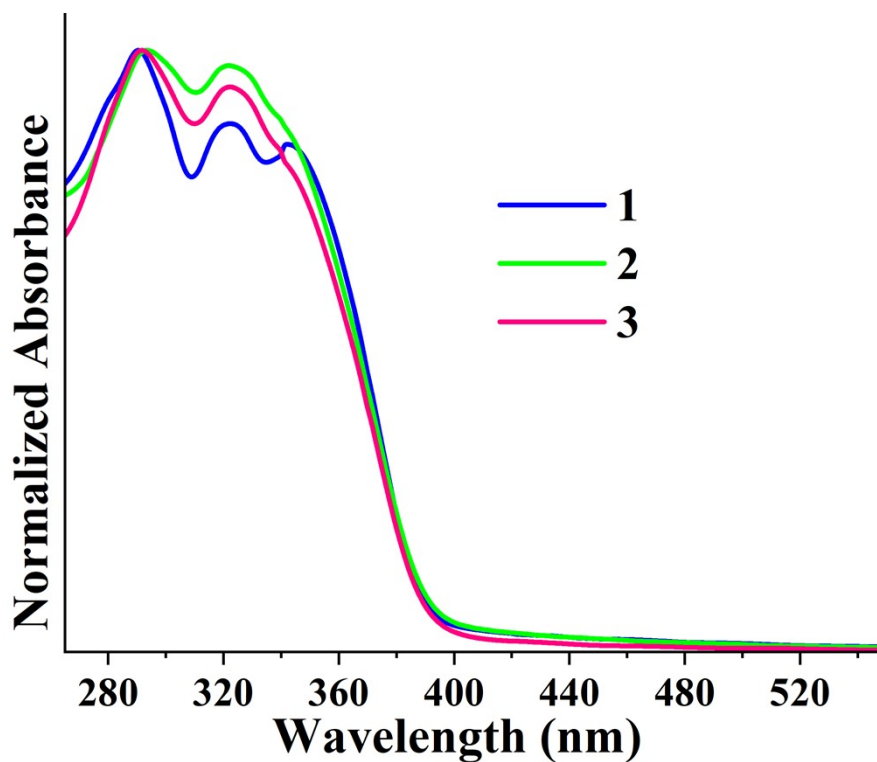

Figure S24. UV-Vis absorption spectra of PMMA encapsulated films of 1-3

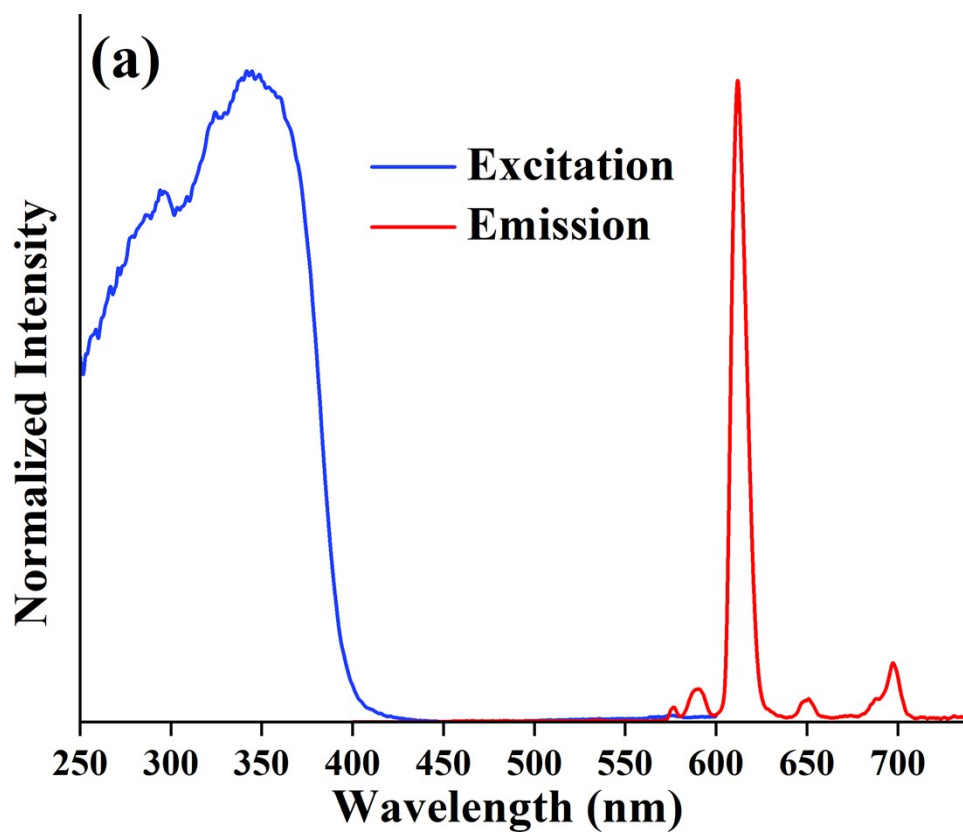



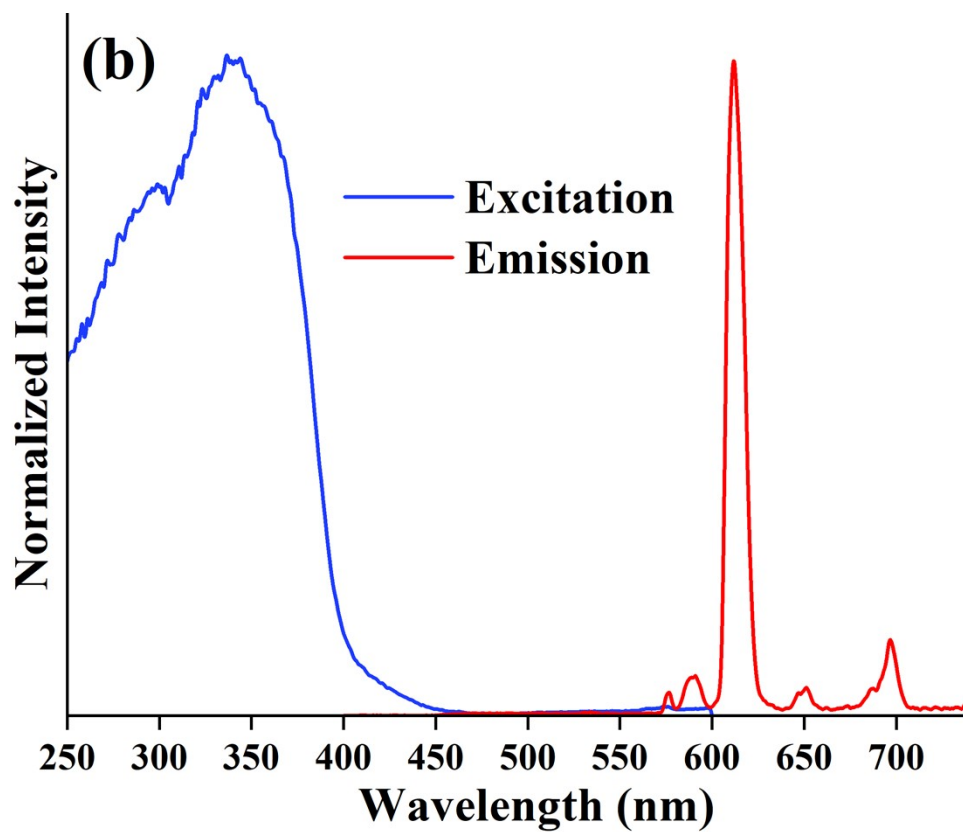

**Figure S25.** Excitation and luminescence spectra of PMMA encapsulated films (a) **1** and (b) **3** ( $\lambda_{\text{ex}} = 340$  nm and  $\lambda_{\text{em}} = 611$  nm)

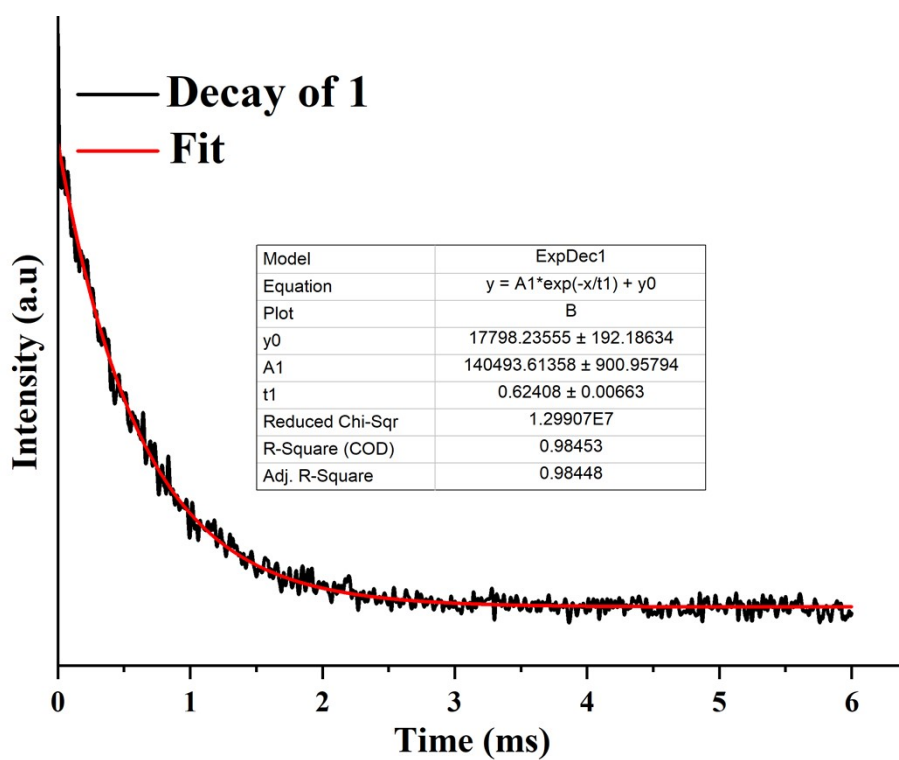

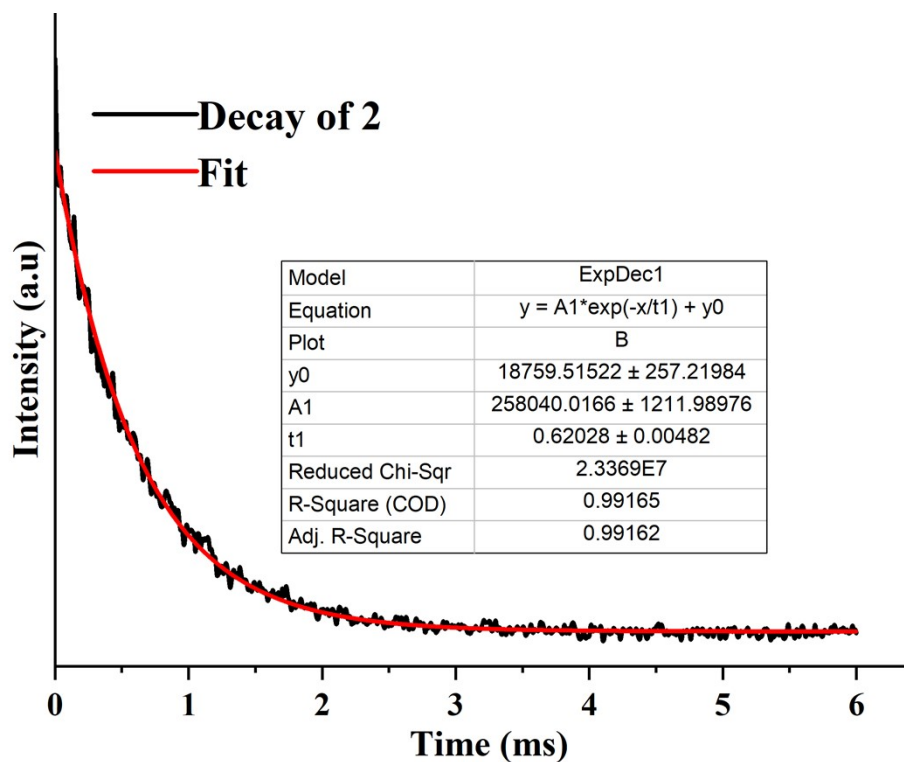

Figure S26. Luminescence decay profiles of complexes 1 and 2 in PMMA films ( $\lambda_{\text{ex}}=340$  and  $\lambda_{\text{em}}=611$  nm)

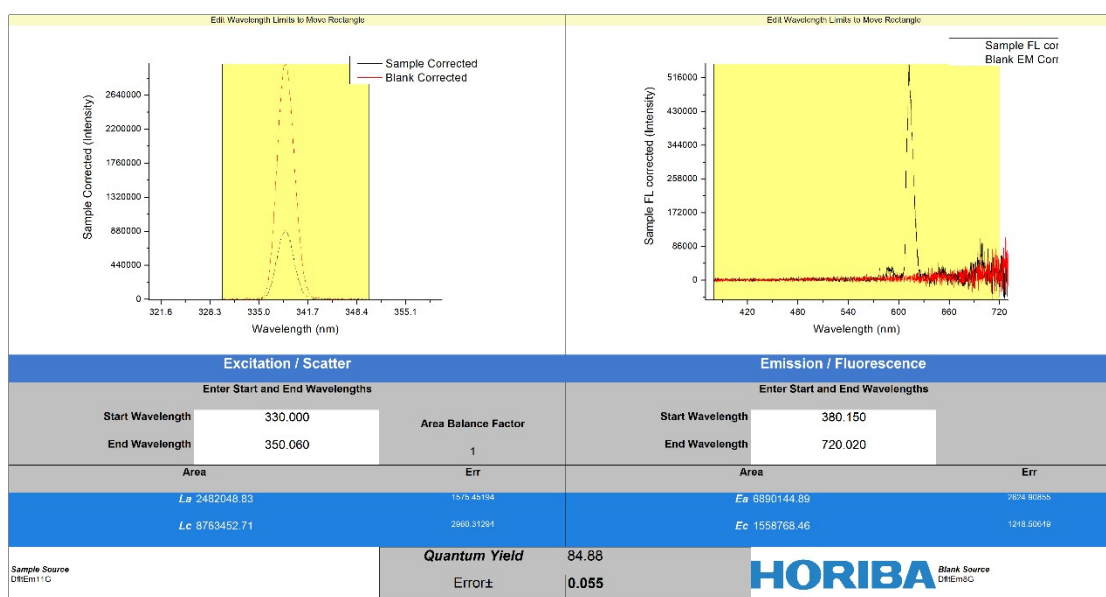

Figure S27. Absolute luminescence quantum yield measurements of PMMA encapsulated films of 1 ( $\lambda_{\text{ex}}=340$ )

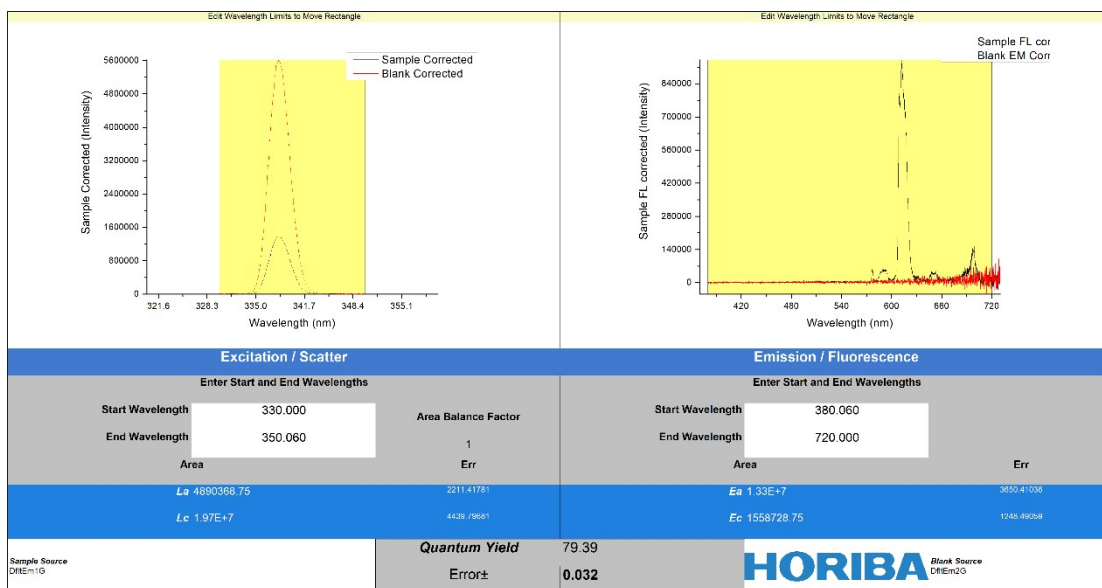

Figure S28. Absolute luminescence quantum yield measurements of PMMA encapsulated films of **2** ( $\lambda_{ex}=340$ )

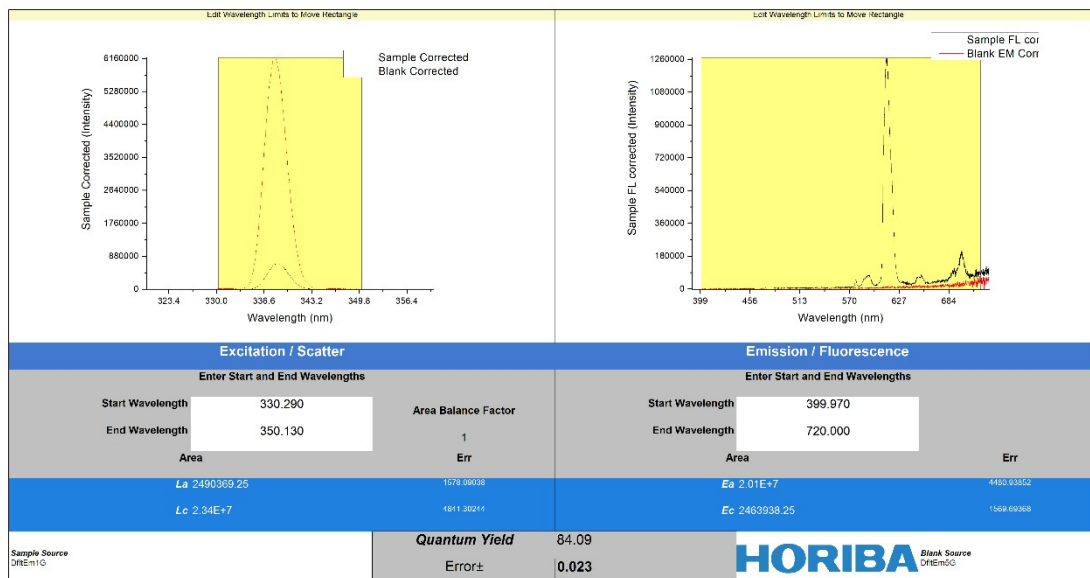

Figure S29. Absolute luminescence quantum yield measurements of PMMA encapsulated films of **3** ( $\lambda_{ex}=340$ )

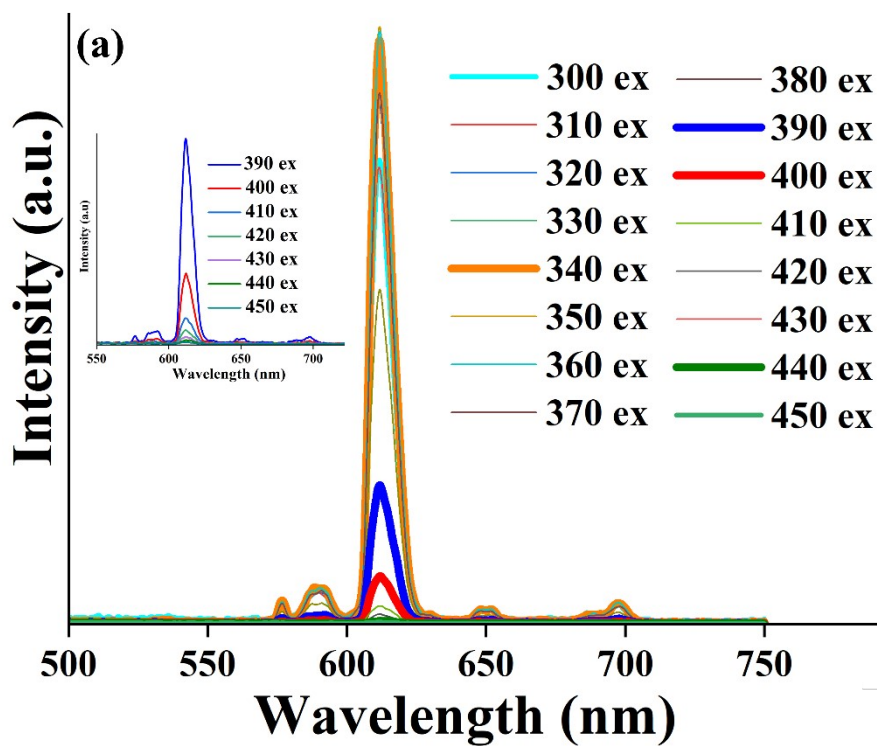

Figure S30. Luminescence spectra of PMMA encapsulated films of **1** at different excitations in the region 300-450 nm

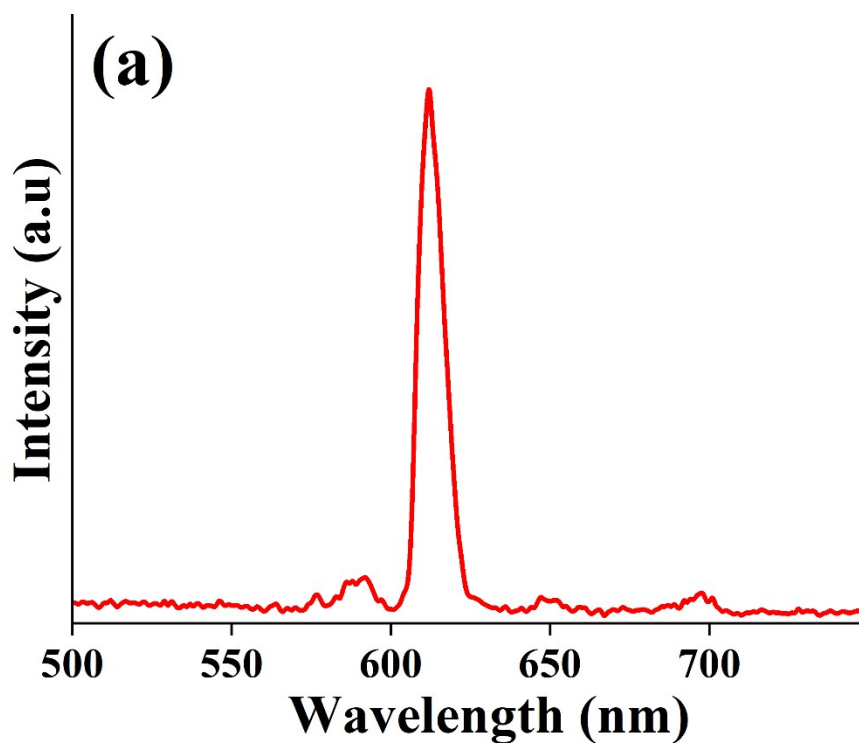

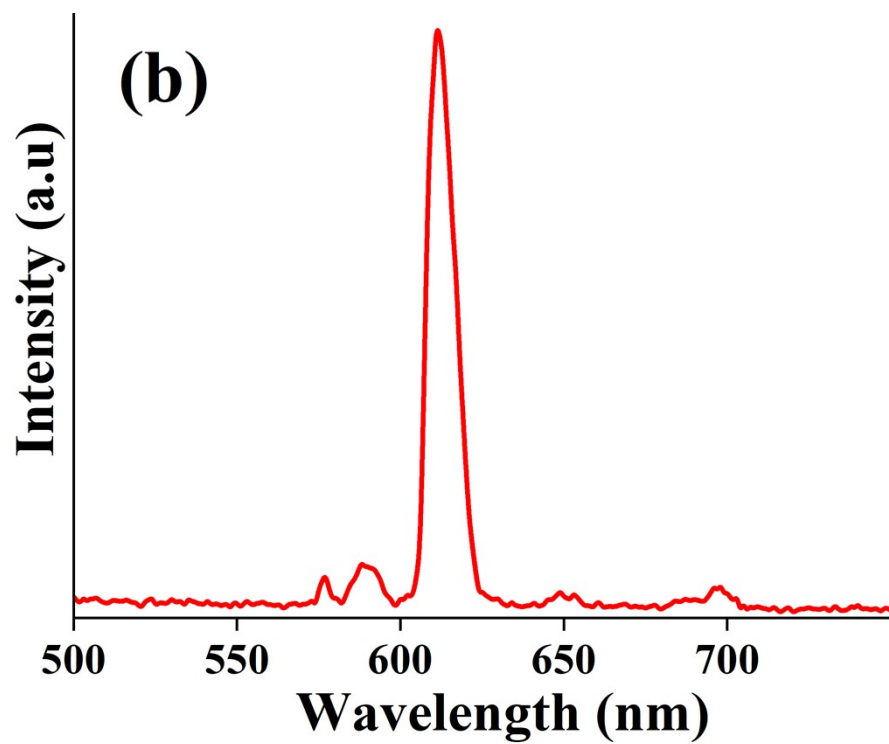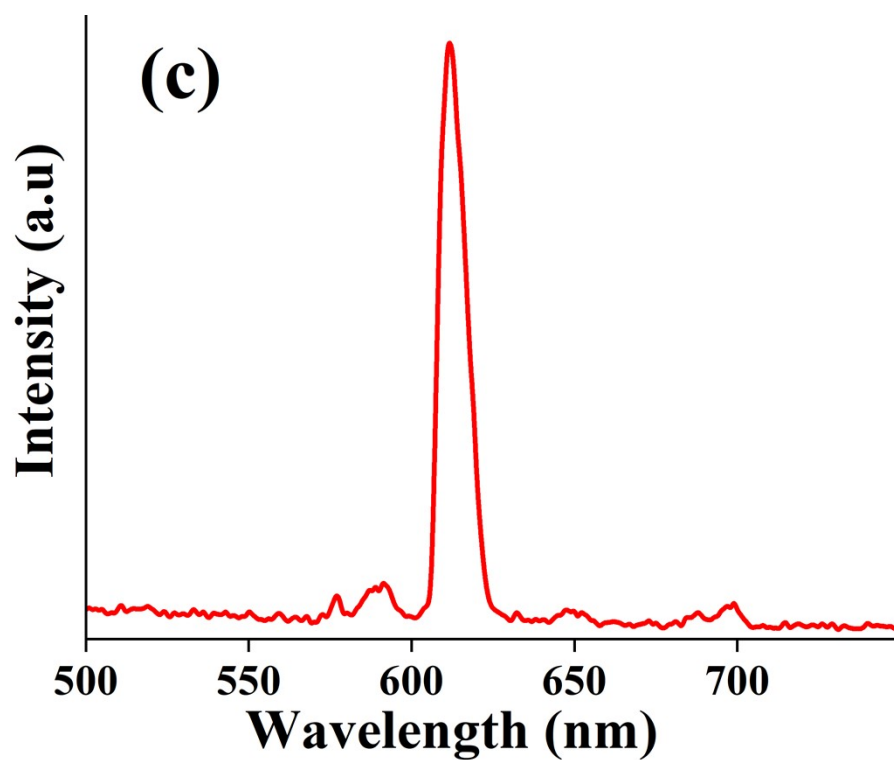

Figure S31. Luminescence spectra of PMMA encapsulated films (a) 1 (b) 2 and (c) 3 ( $\lambda_{\text{ex}} = 400$  nm)

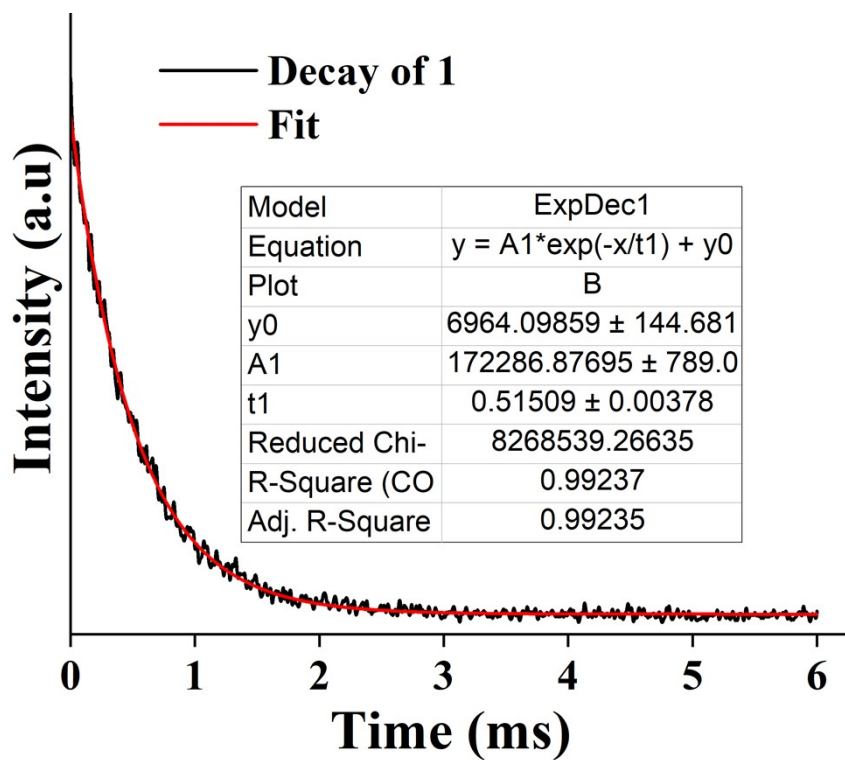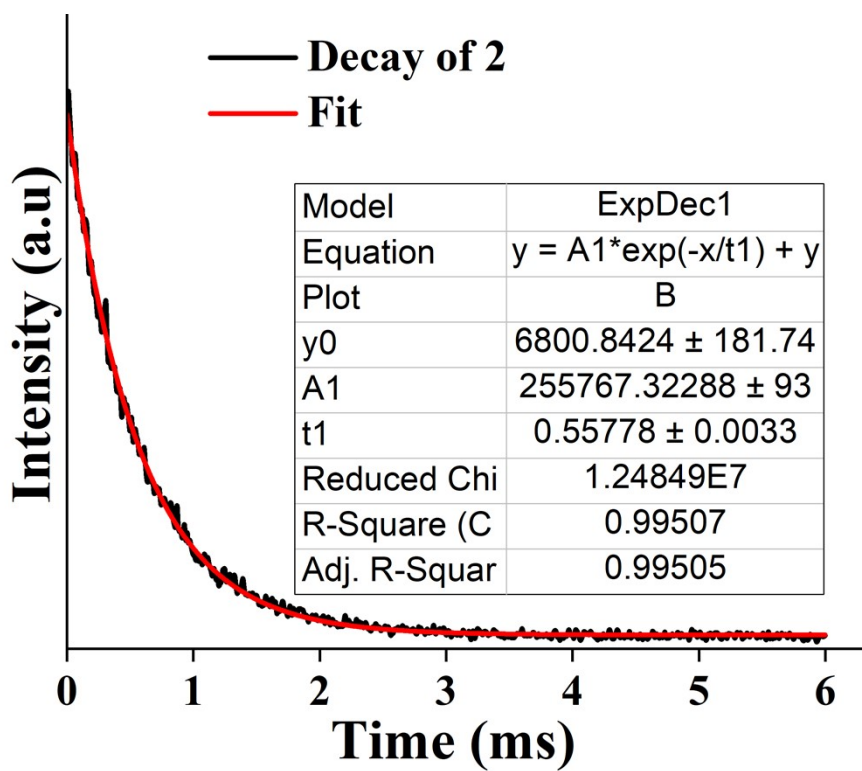

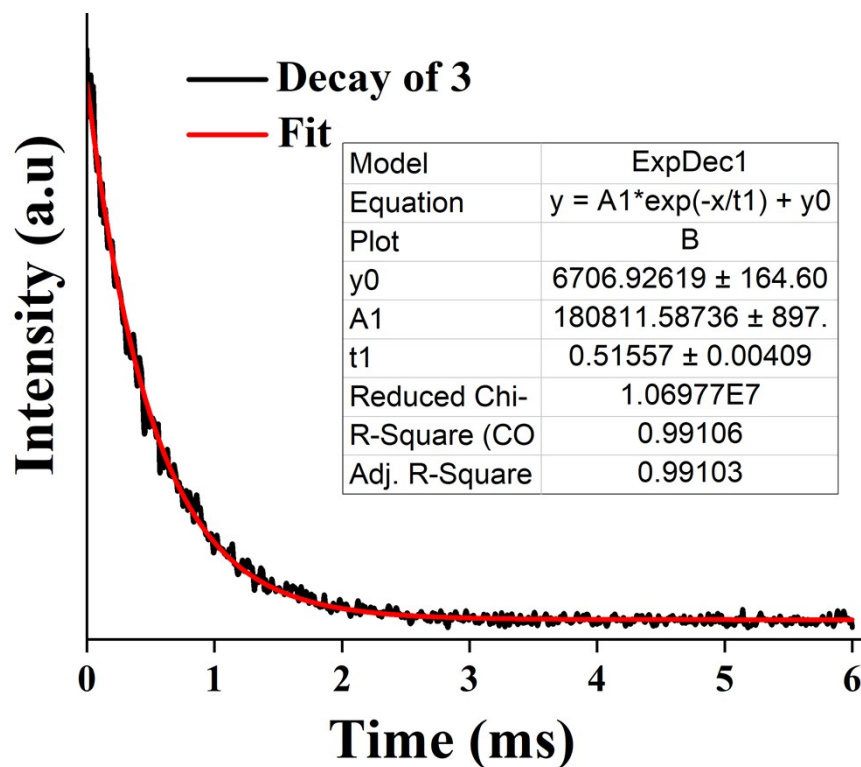

Figure S32. Luminescence decay profiles of 1-3 in PMMA encapsulated films ( $\lambda_{ex}$ =400 and  $\lambda_{em}$ =611 nm)

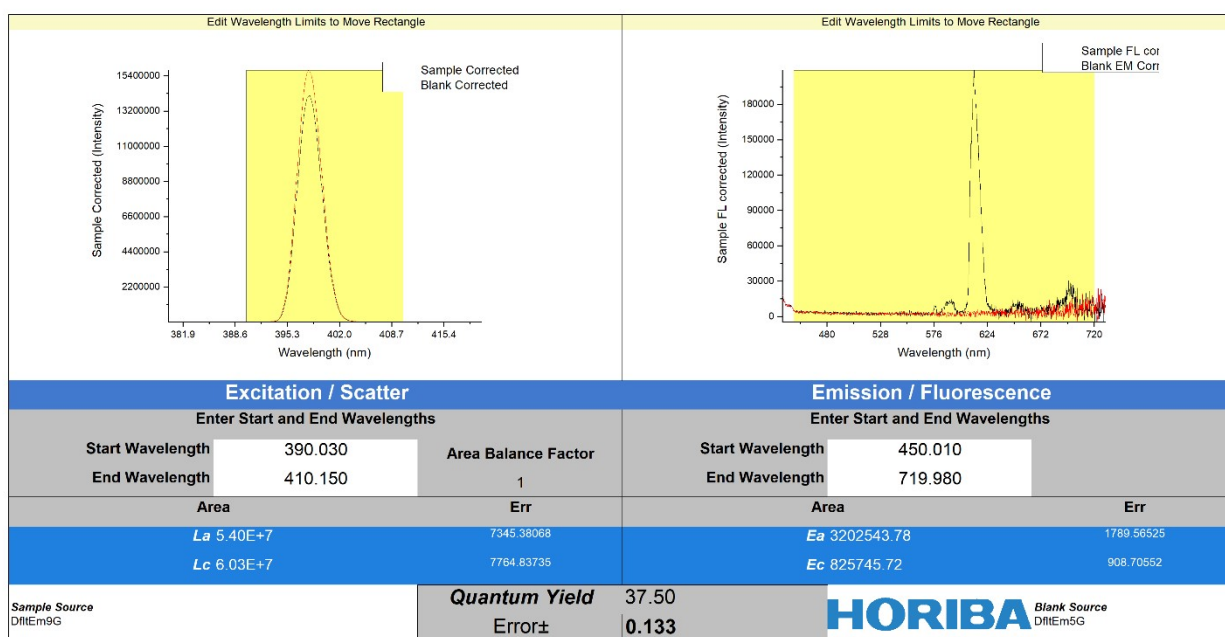

Figure S33. Absolute luminescence quantum yield measurements of PMMA encapsulated films of 1 ( $\lambda_{ex}$ =400)



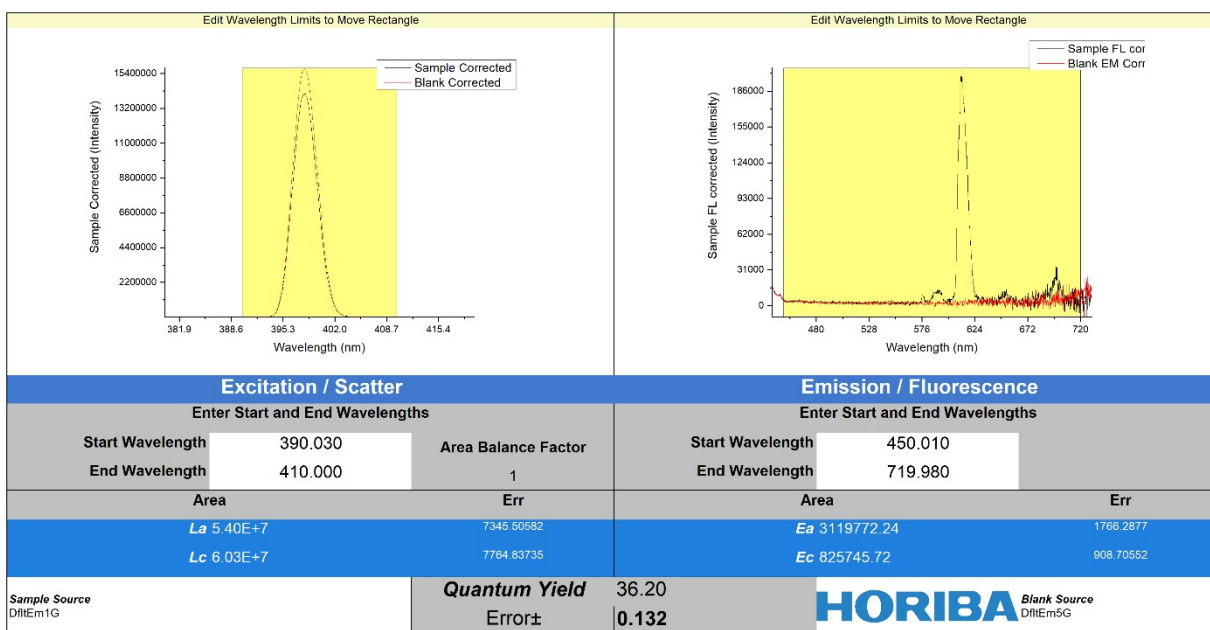

Figure S34. Absolute luminescence quantum yield measurements of PMMA encapsulated films of **2** ( $\lambda_{ex}=400$ )

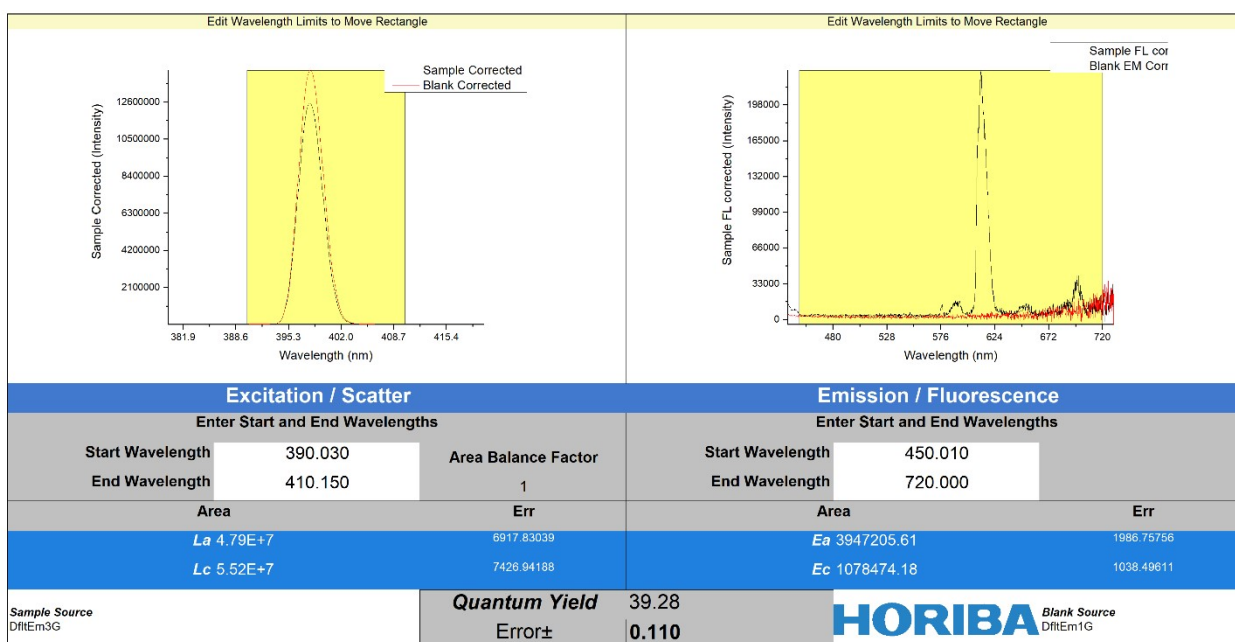

Figure S35. Absolute luminescence quantum yield measurements of PMMA encapsulated films of **3** ( $\lambda_{ex}=400$ )



**Table S2.** Photophysical properties of **1–3** ( $\lambda_{\text{ex}} = 400 \text{ nm}$  and  $\lambda_{\text{em}} = 611 \text{ nm}$ ).

|          | $\tau_{\text{Ln}}(\text{ms})^{\text{a}}$ | $\tau_{\text{R}}(\text{ms})^{\text{b}}$ | $\Phi_{\text{Ln}}(\%)^{\text{c}}$ | $\Phi_{\text{tot}}(\%)^{\text{d}}$ | $\eta_{\text{sen}}(\%)^{\text{e}}$ | $k_{\text{r}}(\text{s}^{-1})^{\text{f}}$ | $k_{\text{nr}}(\text{s}^{-1})^{\text{g}}$ |
|----------|------------------------------------------|-----------------------------------------|-----------------------------------|------------------------------------|------------------------------------|------------------------------------------|-------------------------------------------|
| <b>1</b> | 0.52                                     | 1.14                                    | 90                                | 38                                 | 42                                 | $0.9 \times 10^3$                        | $1.1 \times 10^3$                         |
| <b>2</b> | 0.56                                     | 1.17                                    | 88                                | 36                                 | 41                                 | $0.9 \times 10^3$                        | $0.9 \times 10^3$                         |
| <b>3</b> | 0.52                                     | 1.16                                    | 91                                | 39                                 | 43                                 | $0.9 \times 10^3$                        | $1.1 \times 10^3$                         |

<sup>a</sup>Lanthanide luminescence lifetime obtained from TRPL spectra. <sup>b</sup>radiative lifetime  $\tau_{\text{R}}$ . <sup>c</sup>the intrinsic luminescence quantum yield  $\Phi_{\text{Ln}} = \tau_{\text{Ln}}/\tau_{\text{R}}$ . <sup>d</sup>total luminescence quantum yields ( $\Phi_{\text{tot}}$ ). <sup>e</sup>sensitization efficiency  $\eta_{\text{sen}} = \Phi_{\text{tot}}/\Phi_{\text{Ln}}$ . <sup>f</sup>radiative decay rate constant  $k_{\text{r}} = 1/\tau_{\text{R}}$  and <sup>g</sup>non-radiative decay rate constant,  $k_{\text{nr}} = (\tau_{\text{R}} - \tau_{\text{Ln}})/\tau_{\text{R}}\tau_{\text{Ln}}$ .<sup>2,3</sup>

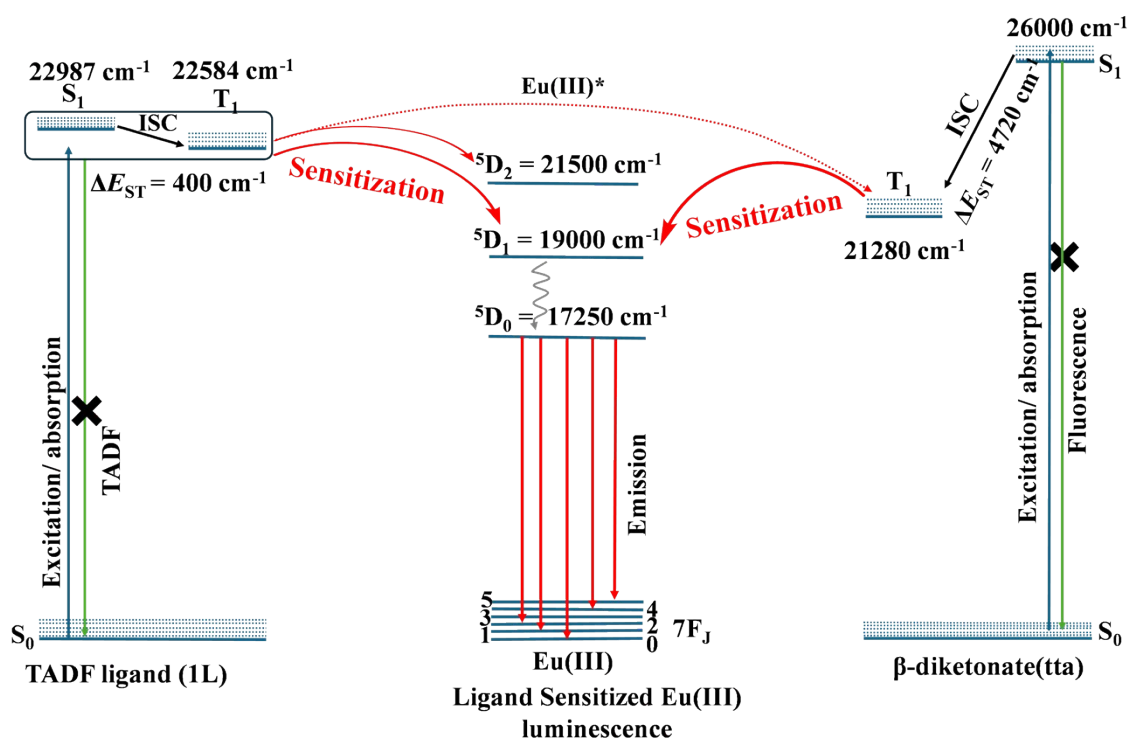

**Figure S36.** The mechanistic energy transfer pathways in the tta and TADF-ligand (**1L**) sensitized Eu(III) luminescence of coordination polymer **1** (energy levels are not up to the scale).

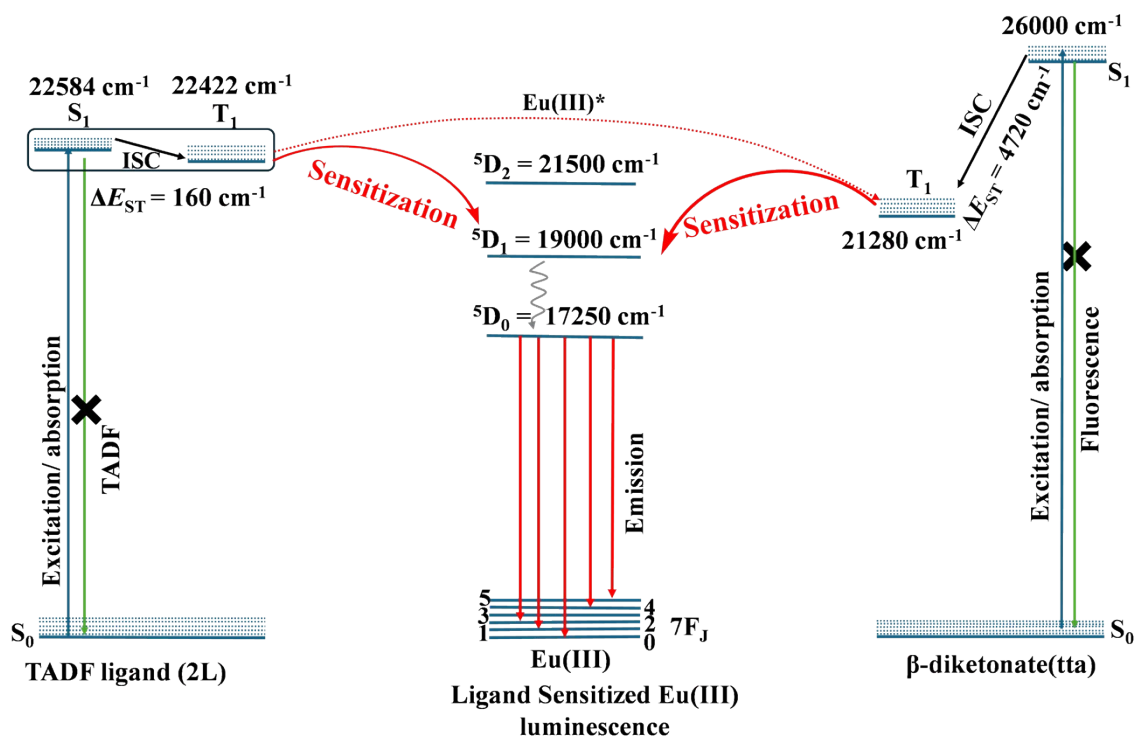

**Figure S37.** The mechanistic energy transfer pathways in the tta and TADF-ligand (**2L**) sensitized Eu(III) luminescence of coordination polymer **2** (energy levels are not up to the scale).

## References

- 1 N. Sharma, M. Maciejczyk, D. Hall, W. Li, V. Liégeois, D. Beljonne, Y. Olivier, N. Robertson, I. D. W. Samuel and E. Zysman-Colman, Spiro-Based Thermally Activated Delayed Fluorescence Emitters with Reduced Nonradiative Decay for High-Quantum-Efficiency, Low-Roll-Off, Organic Light-Emitting Diodes, *ACS Appl. Mater. Interfaces*, 2021, **13**, 44628–44640.
- 2 Y. Kitagawa, M. Tsurui and Y. Hasegawa, Bright red emission with high color purity from Eu(III) complexes with  $\pi$ -conjugated polycyclic aromatic ligands and their sensing applications, *RSC Adv.*, 2022, **12**, 810–821.
- 3 M. H. V Werts, R. T. F. Jukes and J. W. Verhoeven, The emission spectrum and the radiative lifetime of  $\text{Eu}^{3+}$  in luminescent lanthanide complexes, *Phys. Chem. Chem. Phys.*, 2002, **4**, 1542–1548.
